# Supplementary material
Source: publisher figshare collection journal article supplement (https://future-science-group.figshare.com/ndownloader/files/29759403)
Supplement: Supplementary file 1 [file 29759403]

## Sheet: Table 3a (2)
Table 3a. Median index dosage per regimen, 2L cohort.
Regimen, n	Age group, n	Drug 1	Median dosage		Drug 2	Median dosage		Drug 3	Median dosage		Drug 4	Median dosage		Drug 5	Median dosage		Drug 6	Median dosage
LEED, n=15	Age <65, n=13	Cyclophosphamide	60	mg/kg	Etoposide	485.3	mg/m2	Melphalan	132	mg/m2	Dexamethasone	33	mg
	Age 65+, n=2	Cyclophosphamide	56.35	mg/kg	Etoposide	526.25	mg/m2	Melphalan	135.5	mg/m2	Dexamethasone	36.5	mg
R(+/-) GDP based, n=266	Age <65, n=42	Gemcitabine	983	mg/m2	Dexamethasone	39	mg	Cisplatin, n=30	73	mg/m2	Carboplatin, n=14	475	mg	Rituximab, n=26	382	mg/m2
	Age 65+, n=224	Gemcitabine	882.5	mg/m2	Dexamethasone	33	mg	Cisplatin, n=124	59.5	mg/m2	Carboplatin, n=102	400	mg	Rituximab, n=167	384	mg/m2
MCEC, n=7	Age <65, n=7	Ranimustine	204	mg/m2	Carboplatin	310	mg/m2	Etoposide	506.7	mg/m2	Cyclophosphamide	54.2	mg/kg
	Age 65+, n=0	Ranimustine	-	mg/m2	Carboplatin	-	mg/m2	Etoposide	-	mg/m2	Cyclophosphamide	-	mg/kg
MEAM, n=37	Age <65, n=26	Ranimustine	305.5	mg/m2	Cytarabine	527.5	mg/m2	Etoposide	216.8	mg/m2	Melphalan	147.5	mg/m2
	Age 65+, n=11	Ranimustine	309	mg/m2	Cytarabine	415	mg/m2	Etoposide	213.6	mg/m2	Melphalan	153	mg/m2
R(+/-) CHASE based, n=306	Age <65, n=175	Cyclophosphamide	1203	mg/m2	Cytosine arabinoside	1971	mg/m2	Etoposide	118.7	mg/m2	Dexamethasone	33	mg	Rituximab, n=152	386.5	mg/m2
	Age 65+, n=131	Cyclophosphamide	1163	mg/m2	Cytosine arabinoside	1523	mg/m2	Etoposide	115.2	mg/m2	Dexamethasone	33	mg	Rituximab, n=106	385	mg/m2
R(+/-) DHAP based, n=3	Age <65, n=1	Cisplatin	106	mg/m2	Cytosine	4224	mg/m2	Dexamethasone	20	mg	Rituximab, n=1	411	mg/m2
	Age 65+, n=2	Cisplatin	73.5	mg/m2	Cytosine	2666.5	mg/m2	Dexamethasone	25	mg	Rituximab, n=1	615	mg/m2
R(+/-) DeVIC based, n=213	Age <65, n=42	Dexamethasone	33	mg	Etoposide	113.7	mg/m2	Ifosfamide	1705.5	mg/m2	Carboplatin	307	mg/m2	Rituximab, n=30	388	mg/m2
	Age 65+, n=171	Dexamethasone	33	mg	Etoposide	98.8	mg/m2	Ifosfamide	1330	mg/m2	Carboplatin	239	mg/m2	Rituximab, n=141	380	mg/m2
R(+/-) EPOCH based, n=135	Age <65, n=48	Etoposide	63.75	mg/m2	Prednisolone	53.8	mg/m2	Vincristine	0.6	mg/m2	Cyclophosphamide	770.5	mg/m2	Doxorubicin	12.75	mg/m2	Rituximab, n=44	383.5	mg/m2
	Age 65+, n=87	Etoposide	61.9	mg/m2	Prednisolone	43.7	mg/m2	Vincristine	0.6	mg/m2	Cyclophosphamide	713	mg/m2	Doxorubicin	11.5	mg/m2	Rituximab, n=71	383	mg/m2
R(+/-) ESHAP based, n=78	Age <65, n=26	Etoposide	62.25	mg/m2	Cytarabine	1980.5	mg/m2	Cisplatinum	26	mg/m2	Methylprednisolone	500	mg	Rituximab, n=17	391	mg/m2
	Age 65+, n=52	Etoposide	61.8	mg/m2	Cytarabine	1672.5	mg/m2	Cisplatinum	22	mg/m2	Methylprednisolone	500	mg	Rituximab, n=39	379	mg/m2
R(+/-) ICE based, n=26	Age <65, n=10	Ifosfomide	3319	mg/m2	Carboplatin	600	mg	Etoposide	106.75	mg/m2	Rituximab, n=7	380	mg/m2
	Age 65+, n=16	Ifosfomide	1318	mg/m2	Carboplatin	425	mg	Etoposide	106.8	mg/m2	Rituximab, n=13	389	mg/m2
R-CVP based, without doxorubicin, n=296	Age <65, n=17	Rituximab	355	mg/m2	Cyclophosphamide	693	mg/m2	Vincristine	1.2	mg/m2	Prednisolone	46	mg
	Age 65+, n=279	Rituximab	380	mg/m2	Cyclophosphamide	594	mg/m2	Vincristine	1.2	mg/m2	Prednisolone	33	mg
R-Treakisym based, n=84	Age <65, n=18	Rituximab	371.5	mg/m2	Bendamustine	105	mg/m2
	Age 65+, n=66	Rituximab	377	mg/m2	Bendamustine	118	mg/m2

## Sheet: Table 3b (2)
Table 3b. Median index dosage per regimen, 3L cohort.
Regimen, n	Age group, n	Drug 1	Median dosage		Drug 2	Median dosage		Drug 3	Median dosage		Drug 4	Median dosage		Drug 5	Median dosage		Drug 6	Median dosage
LEED, n=23	Age <65, n=19	Cyclophosphamide	63	mg/kg	Etoposide	503.1	mg/m2	Melphalan	140	mg/m2	Dexamethasone	33	mg
	Age 65+, n=4	Cyclophosphamide	53.5	mg/kg	Etoposide	490.35	mg/m2	Melphalan	122.5	mg/m2	Dexamethasone	33	mg
R(+/-) GDP based, n=106	Age <65, n=23	Gemcitabine	1032	mg/m2	Dexamethasone	33	mg	Cisplatin, n=18	74.85	mg/m2	Carboplatin, n=5	500	mg	Rituximab, n=13	387	mg/m2
	Age 65+, n=83	Gemcitabine	837	mg/m2	Dexamethasone	33	mg	Cisplatin, n=43	59.2	mg/m2	Carboplatin, n=40	300	mg	Rituximab, n=62	382	mg/m2
MCEC, n=9	Age <65, n=7	Ranimustine	192	mg/m2	Carboplatin	302	mg/m2	Etoposide	489.9	mg/m2	Cyclophosphamide	49.8	mg/kg
	Age 65+, n=2	Ranimustine	215	mg/m2	Carboplatin	301.5	mg/m2	Etoposide	488.3	mg/m2	Cyclophosphamide	47.05	mg/kg
MEAM, n=44	Age <65, n=35	Ranimustine	299	mg/m2	Cytarabine	512	mg/m2	Etoposide	216.1	mg/m2	Melphalan	142	mg/m2
	Age 65+, n=9	Ranimustine	297	mg/m2	Cytarabine	398	mg/m2	Etoposide	198.1	mg/m2	Melphalan	159	mg/m2
R(+/-) CHASE based, n=72	Age <65, n=35	Cyclophosphamide	1180	mg/m2	Cytosine arabinoside	1925	mg/m2	Etoposide	113.2	mg/m2	Dexamethasone	33	mg	Rituximab, n=27	392	mg/m2
	Age 65+, n=37	Cyclophosphamide	952	mg/m2	Cytosine arabinoside	1404	mg/m2	Etoposide	95.4	mg/m2	Dexamethasone	33	mg	Rituximab, n=30	387	mg/m2
R(+/-) DHAP based, n=1	Age <65, n=0	Cisplatin	-	mg/m2	Cytosine	-	mg/m2	Dexamethasone	-	mg	Rituximab, n=0	-	mg/m2
	Age 65+, n=1	Cisplatin	77.2	mg/m2	Cytosine	1802	mg/m2	Dexamethasone	33	mg	Rituximab, n=0	-	mg/m2
R(+/-) DeVIC based, n=89	Age <65, n=31	Dexamethasone	33	mg	Etoposide	119.6	mg/m2	Ifosfamide	1686	mg/m2	Carboplatin	302	mg/m2	Rituximab, n=22	380	mg/m2
	Age 65+, n=58	Dexamethasone	33	mg	Etoposide	111	mg/m2	Ifosfamide	1357.5	mg/m2	Carboplatin	246	mg/m2	Rituximab, n=47	382.5	mg/m2
R(+/-) EPOCH based, n=91	Age <65, n=30	Etoposide	66.8	mg/m2	Prednisolone	59.5	mg/m2	Vincristine	0.6	mg/m2	Cyclophosphamide	818.5	mg/m2	Doxorubicin	13.2	mg/m2	Rituximab, n=26	393.5	mg/m2
	Age 65+, n=61	Etoposide	67	mg/m2	Prednisolone	55	mg/m2	Vincristine	0.7	mg/m2	Cyclophosphamide	724	mg/m2	Doxorubicin	12.4	mg/m2	Rituximab, n=53	380	mg/m2
R(+/-) ESHAP based, n=41	Age <65, n=18	Etoposide	58.8	mg/m2	Cytarabine	1997.5	mg/m2	Cisplatinum	25.1	mg/m2	Methylprednisolone	250	mg	Rituximab, n=12	387.5	mg/m2
	Age 65+, n=23	Etoposide	58.7	mg/m2	Cytarabine	1603	mg/m2	Cisplatinum	21.5	mg/m2	Methylprednisolone	500	mg	Rituximab, n=17	389	mg/m2
R(+/-) ICE based, n=14	Age <65, n=5	Ifosfomide	5110	mg/m2	Carboplatin	750	mg	Etoposide	113.8	mg/m2	Rituximab, n=4	388.5	mg/m2
	Age 65+, n=9	Ifosfomide	1224	mg/m2	Carboplatin	330	mg	Etoposide	87	mg/m2	Rituximab, n=9	395	mg/m2
R-CVP based, without doxorubicin, n=40	Age <65, n=8	Rituximab	359.5	mg/m2	Cyclophosphamide	703.5	mg/m2	Vincristine	1.15	mg/m2	Prednisolone	32	mg
	Age 65+, n=32	Rituximab	385	mg/m2	Cyclophosphamide	639.5	mg/m2	Vincristine	1.2	mg/m2	Prednisolone	36	mg
R-Treakisym based, n=36	Age <65, n=3	Rituximab	391	mg/m2	Bendamustine	103	mg/m2
	Age 65+, n=33	Rituximab	371	mg/m2	Bendamustine	75	mg/m2

## Sheet: Supp Table 1
Supplementary Table 1. Exchange rate and inflation rate conversion table.
Year	Japanese Yen (JPY) - US Dollar (USD) Historical Exchange Rate*		Inflation Rate Conversion Multiplication Factor (Base Year 2020)
	JPY per USD	USD per JPY
2008	106.63	0.00937822	1.033
2009	89.51	0.0111719	1.048
2010	90.19	0.0110877	1.056
2011	82.04	0.0121892	1.058
2012	76.3	0.0131062	1.059
2013	90.92	0.0109987	1.055
2014	102.49	0.00975705	1.027
2015	117.9	0.00848176	1.019
2016	120.63	0.00828981	1.02
2017	113.53	0.00880824	1.015
2018	108.7	0.00919963	1.006
2019	108.73	0.00919709	1.001
*Published monthly by the Bank of Japan, using data at end of January of each year

## Sheet: Supp Table 2
Supplementary Table 2. Additional baseline and treatment characteristics
	2L		3L
	2L Cohort	2L Auto-SCT Cohort	3L Cohort	3L Auto-SCT Cohort
	(n=2927)	(n=59)	(n=1085)	(n=77)
Lactate dehydrogenase (LDH, in U/L) at index visit*
n / n missing	483/2444	7/52	216/869	7/52
Mean (SD)	281.2 (297.8)	222.6 (66.6)	276.2 (224.9)	187.6 (41.0)
Median (Q1, Q3)	210.0 (175.0, 277.0)	201.0 (178.0, 258.0)	216.0 (174.5, 296.0)	192.0 (148.0, 216.0)
Absolute lymphocyte count at index visit*
n / n missing	367/2560	6/53	164/921	7/52
Mean (SD)	1274.9 (5720.0)	451.6 (299.1)	953.7 (648.8)	889.4 (771.8)
Median (Q1, Q3)	858.6 (531.3, 1272.6)	453.0 (198.4, 532.0)	758.4 (472.8, 1259.2)	590.0 (409.5, 1381.6)
Modified Charlson Comorbidity Index during lookback period
Mean (SD)	3.6 (2.5)	4.3 (2.7)	3.8 (2.5)	4.1 (2.6)
Charlson Comorbidity Index during lookback period
Mean (SD)	4.0 (2.2)	4.5 (2.5)	4.3 (2.3)	4.5 (2.4)
Median (Q1, Q3)	4.0 (2.0, 5.0)	4.0 (3.0, 6.0)	4.0 (2.0, 6.0)	4.0 (3.0, 6.0)
Year of initiation of index therapy, n(%)
2008	2 (0.1)	0 (0.0)	0 (0.0)	0 (0.0)
2009	24 (0.8)	0 (0.0)	5 (0.5)	0 (0.0)
2010	57 (1.9)	1 (1.7)	19 (1.8)	1 (1.3)
2011	87 (3.0)	2 (3.4)	33 (3.0)	2 (2.6)
2012	132 (4.5)	1 (1.7)	42 (3.9)	1 (1.3)
2013	215 (7.3)	4 (6.8)	65 (6.0)	4 (5.2)
2014	358 (12.2)	12 (20.3)	115 (10.6)	6 (7.8)
2015	369 (12.6)	7 (11.9)	155 (14.3)	8 (10.4)
2016	464 (15.9)	12 (20.3)	169 (15.6)	17 (22.1)
2017	567 (19.4)	7 (11.9)	217 (20.0)	15 (19.5)
2018	652 (22.3)	13 (22.0)	265 (24.4)	23 (29.9)
Comorbidity during the look-back period, n (%)
Congestive heart failure	636 (21.7)	14 (23.7)	280 (25.8)	29 (37.7)
Dementia	43 (1.5)	0 (0.0)	15 (1.4)	0 (0.0)
Chronic pulmonary disease	661 (22.6)	28 (47.5)	276 (25.4)	32 (41.6)
Rheumatologic disease	122 (4.2)	2 (3.4)	38 (3.5)	2 (2.6)
Mild liver disease	733 (25.0)	20 (33.9)	302 (27.8)	27 (35.1)
Diabetes with chronic complications	108 (3.7)	0 (0.0)	37 (3.4)	1 (1.3)
Hemiplegia or paraplegia	52 (1.8)	0 (0.0)	18 (1.7)	0 (0.0)
Renal disease	125 (4.3)	1 (1.7)	44 (4.1)	3 (3.9)
Any malignancy, including lymphoma and leukemia	2923 (99.9)	59 (100.0)	1080 (99.5)	76 (98.7)
Malignancies excluding DLBCL (index disease)	2144 (73.2)	52 (88.1)	789 (72.7)	59 (76.6)
Moderate or severe liver disease	26 (0.9)	1 (1.7)	12 (1.1)	0 (0.0)
Metastatic solid tumor	468 (16.0)	12 (20.3)	201 (18.5)	11 (14.3)
AIDS/HIV	7 (0.2)	0 (0.0)	3 (0.3)	0 (0.0)
Subsequent treatment patterns
Subsequent regimen (4L), n (%)
N with 4L	1265	13	799	41
DeVIC-based +/- R	95 (7.5)	2 (15.4)	60 (7.5)	5 (12.2)
CHASE-based +/- R	72 (5.7)	0 (0.0)	43 (5.4)	3 (7.3)
GDP-based +/- R	118 (9.3)	2 (15.4)	81 (10.1)	4 (9.8)
R-Bendamustine-based	34 (2.7)	0 (0.0)	20 (2.5)	1 (2.4)
EPOCH-based +/- R	64 (5.1)	0 (0.0)	45 (5.6)	1 (2.4)
ESHAP-based +/- R	22 (1.7)	0 (0.0)	15 (1.9)	0 (0.0)
R-CVP-based, without doxorubicin	20 (1.6)	0 (0.0)	16 (2.0)	1 (2.4)
ICE-based +/- R	12 (0.9)	0 (0.0)	6 (0.8)	3 (7.3)
DHAP-based +/- R	3 (0.2)	0 (0.0)	2 (0.3)	1 (2.4)
Other chemotherapy	542 (42.8)	5 (38.5)	361 (45.2)	8 (19.5)
Others (not specified)	283 (22.4)	4 (30.8)	150 (18.8)	14 (34.1)
Subsequent regimen (5L), n (%)
N with 5L	723	4	531	20
DeVIC-based +/- R	53 (7.3)	2 (50.0)	42 (7.9)	1 (5.0)
CHASE-based +/- R	27 (3.7)	0 (0.0)	22 (4.1)	0 (0.0)
GDP-based +/- R	64 (8.9)	0 (0.0)	45 (8.5)	3 (15.0)
R-Bendamustine-based	13 (1.8)	0 (0.0)	10 (1.9)	2 (10.0)
EPOCH-based +/- R	20 (2.8)	1 (25.0)	19 (3.6)	0 (0.0)
ESHAP-based +/- R	18 (2.5)	0 (0.0)	16 (3.0)	1 (5.0)
R-CVP-based, without doxorubicin	10 (1.4)	0 (0.0)	11 (2.1)	0 (0.0)
ICE-based +/- R	10 (1.4)	0 (0.0)	8 (1.5)	0 (0.0)
DHAP-based +/- R	1 (0.1)	0 (0.0)	1 (0.2)	0 (0.0)
Other chemotherapy	321 (44.4)	0 (0.0)	244 (46.0)	10 (50.0)
Others (not specified)	186 (25.7)	1 (25.0)	113 (21.3)	3 (15.0)
Subsequent regimen (6L), n (%)
N with 6L	381	2	307	7
DeVIC-based +/- R	30 (7.9)	1 (50.0)	25 (8.1)	1 (14.3)
CHASE-based +/- R	11 (2.9)	0 (0.0)	7 (2.3)	0 (0.0)
GDP-based +/- R	31 (8.1)	1 (50.0)	29 (9.4)	0 (0.0)
R-Bendamustine-based	8 (2.1)	0 (0.0)	7 (2.3)	0 (0.0)
EPOCH-based +/- R	10 (2.6)	0 (0.0)	9 (2.9)	0 (0.0)
ESHAP-based +/- R	9 (2.4)	0 (0.0)	8 (2.6)	0 (0.0)
R-CVP-based, without doxorubicin	8 (2.1)	0 (0.0)	6 (2.0)	2 (28.6)
ICE-based +/- R	1 (0.3)	0 (0.0)	1 (0.3)	0 (0.0)
DHAP-based +/- R	0 (0.0)	0 (0.0)	0 (0.0)	0 (0.0)
Other chemotherapy	172 (45.1)	0 (0.0)	143 (46.6)	4 (57.1)
Others (not specified)	101 (26.5)	0 (0.0)	72 (23.5)	0 (0.0)
Duration of index regimen, days
Mean (SD)	104.7 (163.0)	6.0 (1.6)	90.2 (136.6)	6.1 (3.0)
Median (Q1, Q3)	67.0 (31.0, 123.0)	6.0 (5.0, 7.0)	55.0 (25.0, 106.0)	6.0 (4.0, 7.0)
Duration of 3L regimen, days (only for 2L cohort)
N with 3L	2068	30
Mean (SD)	81.3 (137.5)	97.2 (129.3)
Median (Q1, Q3)	46.0 (14.0, 95.0)	63.0 (15.0, 112.0)
Duration of 4L regimen, days
N with 4L	1265	13	799	41
Mean (SD)	74.0 (107.7)	53.2 (56.1)	80.8 (114.8)	79.7 (84.6)
Median (Q1, Q3)	43.0 (15.0, 93.0)	32.0 (23.0, 62.0)	49.0 (17.0, 106.0)	61.0 (31.0, 103.0)
Duration of 5L regimen, days
N with 5L	723	4	531	20
Mean (SD)	67.2 (108.7)	44.5 (31.8)	65.1 (90.1)	66.9 (61.6)
Median (Q1, Q3)	36.0 (14.0, 75.0)	48.0 (20.5, 68.5)	42.0 (14.0, 79.0)	39.5 (26.5, 106.5)
Duration of 6L regimen, days
N with 6L	381	2	307	7
Mean (SD)	64.3 (80.7)	76.0 (45.3)	66.2 (77.6)	67.7 (79.2)
Median (Q1, Q3)	41.0 (14.0, 82.0)	76.0 (44.0, 108.0)	44.0 (14.0, 89.0)	42.0 (31.0, 72.0)
Patients with radiation therapy at index regimen, n (%)
During index regimen	253 (8.6)	1 (1.7)	95 (8.8)	7 (9.1)
During entire patient follow-up	838 (28.6)	10 (16.9)	297 (27.4)	22 (28.6)
Patients with radiation therapy at 3L, n (%)
N with 3L	2068	30
During regimen	203 (9.8)	2 (6.7)
Patients with radiation therapy at 4L, n (%)
N with 4L	1265	13	799	41
During regimen	119 (9.4)	1 (7.7)	71 (8.9)	5 (12.2)
Patients with radiation therapy at 5L, n (%)
N with 5L	723	4	531	20
During regimen	61 (8.4)	1 (25.0)	42 (7.9)	1 (5.0)
Patients with radiation therapy at 6L, n (%)
N with 6L	381	2	307	7
During regimen	36 (9.4)	0 (0.0)	30 (9.8)	1 (14.3)
*Using closest values on index date, or within 6 months prior to or 30 days after index date

## Sheet: Supp Table 3
Supplementary Table 3. Distribution of patients by age group in each index regimen
	2L	3L
	(n=2986)	(n=1162)
Age at initiation, n (%)
DeVIC-based +/- R
N with DeVIC-based +/- R	216	90
0-18	1 (0.5)	0 (0.0)
18-39	3 (1.4)	3 (3.3)
40-44	4 (1.9)	2 (2.2)
45-49	0 (0.0)	2 (2.2)
50-54	12 (5.6)	4 (4.4)
55-59	8 (3.7)	7 (7.8)
60-64	15 (6.9)	13 (14.4)
65-69	33 (15.3)	12 (13.3)
70-74	42 (19.4)	20 (22.2)
75-79	57 (26.4)	11 (12.2)
80+	41 (19.0)	16 (17.8)
CHASE-based +/- R
N with CHASE-based +/- R	313	73
0-18	3 (1.0)	1 (1.4)
18-39	13 (4.2)	4 (5.5)
40-44	7 (2.2)	2 (2.7)
45-49	20 (6.4)	4 (5.5)
50-54	21 (6.7)	7 (9.6)
55-59	55 (17.6)	9 (12.3)
60-64	62 (19.8)	9 (12.3)
65-69	74 (23.6)	10 (13.7)
70-74	32 (10.2)	11 (15.1)
75-79	17 (5.4)	12 (16.4)
80+	9 (2.9)	4 (5.5)
GDP-based +/- R
N with GDP-based +/- R	270	106
0-18	0 (0.0)	0 (0.0)
18-39	3 (1.1)	3 (2.8)
40-44	1 (0.4)	2 (1.9)
45-49	3 (1.1)	2 (1.9)
50-54	9 (3.3)	2 (1.9)
55-59	9 (3.3)	8 (7.5)
60-64	18 (6.7)	6 (5.7)
65-69	38 (14.1)	19 (17.9)
70-74	60 (22.2)	17 (16.0)
75-79	60 (22.2)	23 (21.7)
80+	69 (25.6)	24 (22.6)
R-Bendamustine-based
N with R-Bendamustine-based	85	36
0-18	0 (0.0)	0 (0.0)
18-39	2 (2.4)	1 (2.8)
40-44	0 (0.0)	0 (0.0)
45-49	0 (0.0)	0 (0.0)
50-54	2 (2.4)	0 (0.0)
55-59	7 (8.2)	1 (2.8)
60-64	8 (9.4)	1 (2.8)
65-69	16 (18.8)	7 (19.4)
70-74	21 (24.7)	7 (19.4)
75-79	13 (15.3)	10 (27.8)
80+	16 (18.8)	9 (25.0)
EPOCH-based +/- R
N with EPOCH-based +/- R	140	91
0-18	1 (0.7)	0 (0.0)
18-39	10 (7.1)	5 (5.5)
40-44	5 (3.6)	2 (2.2)
45-49	6 (4.3)	4 (4.4)
50-54	3 (2.1)	6 (6.6)
55-59	12 (8.6)	5 (5.5)
60-64	13 (9.3)	8 (8.8)
65-69	29 (20.7)	19 (20.9)
70-74	25 (17.9)	20 (22.0)
75-79	15 (10.7)	13 (14.3)
80+	21 (15.0)	9 (9.9)
ESHAP-based +/- R
N with ESHAP-based +/- R	80	41
0-18	0 (0.0)	0 (0.0)
18-39	1 (1.3)	1 (2.4)
40-44	1 (1.3)	0 (0.0)
45-49	2 (2.5)	1 (2.4)
50-54	4 (5.0)	3 (7.3)
55-59	6 (7.5)	6 (14.6)
60-64	14 (17.5)	7 (17.1)
65-69	20 (25.0)	10 (24.4)
70-74	16 (20.0)	4 (9.8)
75-79	13 (16.3)	9 (22.0)
80+	3 (3.8)	0 (0.0)
R-CVP-based, without doxorubicin
N with R-CVP-based, without doxorubicin	304	40
0-18	0 (0.0)	0 (0.0)
18-39	1 (0.3)	1 (2.5)
40-44	0 (0.0)	0 (0.0)
45-49	2 (0.7)	1 (2.5)
50-54	1 (0.3)	0 (0.0)
55-59	5 (1.6)	1 (2.5)
60-64	8 (2.6)	5 (12.5)
65-69	21 (6.9)	5 (12.5)
70-74	63 (20.7)	10 (25.0)
75-79	79 (26.0)	7 (17.5)
80+	124 (40.8)	10 (25.0)
ICE-based +/- R
N with ICE-based +/- R	26	14
0-18	0 (0.0)	0 (0.0)
18-39	2 (7.7)	0 (0.0)
40-44	0 (0.0)	1 (7.1)
45-49	0 (0.0)	1 (7.1)
50-54	0 (0.0)	0 (0.0)
55-59	4 (15.4)	1 (7.1)
60-64	4 (15.4)	2 (14.3)
65-69	2 (7.7)	1 (7.1)
70-74	5 (19.2)	5 (35.7)
75-79	3 (11.5)	1 (7.1)
80+	6 (23.1)	2 (14.3)
DHAP-based +/- R
N with DHAP-based +/- R	3	1
0-18	0 (0.0)	0 (0.0)
18-39	0 (0.0)	0 (0.0)
40-44	0 (0.0)	0 (0.0)
45-49	0 (0.0)	0 (0.0)
50-54	0 (0.0)	0 (0.0)
55-59	1 (33.3)	0 (0.0)
60-64	0 (0.0)	0 (0.0)
65-69	1 (33.3)	0 (0.0)
70-74	1 (33.3)	0 (0.0)
75-79	0 (0.0)	1 (100.0)
80+	0 (0.0)	0 (0.0)
Other chemotherapy
N with Other chemotherapy	1490	593
0-18	3 (0.2)	1 (0.2)
18-39	34 (2.3)	16 (2.7)
40-44	24 (1.6)	9 (1.5)
45-49	52 (3.5)	17 (2.9)
50-54	69 (4.6)	28 (4.7)
55-59	85 (5.7)	36 (6.1)
60-64	177 (11.9)	78 (13.2)
65-69	271 (18.2)	111 (18.7)
70-74	257 (17.2)	97 (16.4)
75-79	240 (16.1)	100 (16.9)
80+	278 (18.7)	100 (16.9)
Autologous SCT conditioning therapy
N with Autologous SCT conditioning therapy	59	77
0-18	0 (0.0)	0 (0.0)
18-39	2 (3.4)	7 (9.1)
40-44	0 (0.0)	3 (3.9)
45-49	5 (8.5)	5 (6.5)
50-54	9 (15.3)	8 (10.4)
55-59	13 (22.0)	15 (19.5)
60-64	17 (28.8)	24 (31.2)
65-69	12 (20.3)	12 (15.6)
70-74	1 (1.7)	3 (3.9)
75-79	0 (0.0)	0 (0.0)
80+	0 (0.0)	0 (0.0)

## Sheet: Supp Table 4
Supplementary Table 4. Median index dosage for each regimen
Regimen, n	Age group, n	Drug 1	Median dosage	Drug 2	Median dosage	Drug 3	Median dosage	Drug 4	Median dosage
2L cohort
LEED, n=15	Age <65, n=13	Cyclophosphamide	60.0mg/kg	Etoposide	485.3mg/m2	Melphalan	132.0mg/m2	Dexamethasone	33.0mg
	Age 65+, n=2	Cyclophosphamide	56.4mg/kg	Etoposide	526.3mg/m2	Melphalan	135.5mg/m2	Dexamethasone	36.5mg
MCEC, n=7	Age <65, n=7	Ranimustine	204.0mg/m2	Carboplatin	310.0mg/m2	Etoposide	506.7mg/m2	Cyclophosphamide	54.2mg/kg
	Age 65+, n=0	Ranimustine	-	Carboplatin	-	Etoposide	-	Cyclophosphamide	-
MEAM, n=37	Age <65, n=26	Ranimustine	305.5mg/m2	Cytarabine	527.5mg/m2	Etoposide	216.8mg/m2	Melphalan	147.5mg/m2
	Age 65+, n=11	Ranimustine	309.0mg/m2	Cytarabine	415.0mg/m2	Etoposide	213.6mg/m2	Melphalan	153.0mg/m2
3L cohort
LEED, n=23	Age <65, n=19	Cyclophosphamide	63.0mg/kg	Etoposide	503.1mg/m2	Melphalan	140.0mg/m2	Dexamethasone	33.0mg
	Age 65+, n=4	Cyclophosphamide	53.5mg/kg	Etoposide	490.4mg/m2	Melphalan	122.5mg/m2	Dexamethasone	33.0mg
MCEC, n=9	Age <65, n=7	Ranimustine	192.0mg/m2	Carboplatin	302.0mg/m2	Etoposide	489.9mg/m2	Cyclophosphamide	49.8mg/kg
	Age 65+, n=2	Ranimustine	215.0mg/m2	Carboplatin	301.5mg/m2	Etoposide	488.3mg/m2	Cyclophosphamide	47.1mg/kg
MEAM, n=44	Age <65, n=35	Ranimustine	299.0mg/m2	Cytarabine	512.0mg/m2	Etoposide	216.1mg/m2	Melphalan	142.0mg/m2
	Age 65+, n=9	Ranimustine	297.0mg/m2	Cytarabine	398.0mg/m2	Etoposide	198.1mg/m2	Melphalan	159.0mg/m2

## Sheet: Supp Table 5
Supplementary Table 5. Healthcare resource utilization during the follow-up period, by line of therapy and by index regimen.
		2L												3L
	All regimens	DeVIC-based +/- R	CHASE-based +/- R	GDP-based +/- R	R-Bendamustine-based	EPOCH-based +/- R	ESHAP-based +/- R	R-CVP-based	ICE-based +/- R	DHAP-based +/- R	Other chemotherapy +/- R	Autologous SCT conditioning therapy	P value*	All regimens	DeVIC-based +/- R	CHASE-based +/- R	GDP-based +/- R	R-Bendamustine-based	EPOCH-based +/- R	ESHAP-based +/- R	R-CVP-based	ICE-based +/- R	DHAP-based +/- R	Other chemotherapy +/- R	Autologous SCT conditioning therapy	P value*
	(n=2927)	(n=216)	(n=313)	(n=270)	(n=85)	(n=140)	(n=80)	(n=304)	(n=26)	(n=3)	(n=1490)	(n=59)		(n=1085)	(n=90)	(n=73)	(n=106)	(n=36)	(n=91)	(n=41)	(n=40)	(n=14)	(n=1)	(n=593)	(n=77)
Number of outpatient visits
""" during follow-up, n	2842	209	300	255	82	133	75	299	25	3	1461	58	1.3526e-101	1053	87	72	102	35	89	40	40	13	1	574	77	2.98363e-127
Mean (SD)	36.5 (30.7)	32.8 (27.7)	39.4 (34.5)	32.2 (24.9)	43.8 (33.6)	32.5 (32.5)	37.6 (35.4)	38.0 (31.8)	37.5 (33.0)	22.3 (32.7)	36.8 (30.2)	45.1 (24.4)		34.2 (29.0)	28.8 (23.1)	33.7 (32.8)	33.4 (27.8)	45.5 (39.2)	25.8 (24.5)	33.2 (35.2)	44.2 (39.2)	48.8 (38.5)	8.0 (-)	34.9 (27.4)	41.3 (37.7)
Median (Q1, Q3)	28.0 (15.0, 49.0)	26.0 (13.0, 45.0)	31.0 (15.0, 53.5)	25.0 (14.0, 47.0)	36.0 (22.0, 53.0)	23.0 (12.0, 43.0)	25.0 (10.0, 57.0)	28.0 (17.0, 48.0)	29.0 (10.0, 63.0)	6.0 (1.0, 60.0)	29.0 (16.0, 49.0)	41.5 (24.0, 58.0)		27.0 (13.0, 46.0)	23.0 (12.0, 41.0)	25.0 (8.5, 50.5)	24.5 (14.0, 41.0)	32.0 (12.0, 79.0)	18.0 (10.0, 34.0)	22.5 (11.0, 41.0)	34.0 (15.0, 61.0)	34.0 (28.0, 66.0)	8.0 (8.0, 8.0)	30.0 (15.0, 46.0)	37.0 (18.0, 50.0)
""" during index treatment, n	2441	175	236	222	80	114	51	289	19	3	1252	55	0	921	71	57	84	32	79	33	35	10	0	520	76	6.79187e-128
Mean (SD)	20.5 (21.1)	15.8 (17.3)	12.8 (16.4)	19.0 (16.4)	27.2 (17.0)	18.9 (17.7)	15.5 (20.7)	27.1 (26.5)	13.2 (16.1)	22.0 (33.0)	21.5 (21.6)	32.9 (23.5)		18.6 (20.4)	13.8 (16.6)	15.5 (22.5)	19.3 (18.8)	24.2 (27.2)	18.2 (16.1)	11.3 (14.6)	33.0 (35.2)	23.0 (23.4)	-	18.6 (19.4)	28.4 (33.1)
Median (Q1, Q3)	14.0 (5.0, 28.0)	9.0 (3.0, 24.0)	5.0 (2.0, 17.5)	14.0 (7.0, 26.0)	22.0 (16.5, 38.0)	13.0 (6.0, 27.0)	5.0 (2.0, 26.0)	20.0 (11.0, 33.0)	5.0 (2.0, 19.0)	5.0 (1.0, 60.0)	15.0 (5.5, 29.5)	27.0 (17.0, 44.0)		12.0 (5.0, 26.0)	7.0 (3.0, 18.0)	6.0 (2.0, 18.0)	13.5 (6.5, 24.0)	14.0 (6.0, 30.5)	14.0 (6.0, 28.0)	6.0 (2.0, 11.0)	17.0 (10.0, 53.0)	15.0 (6.0, 31.0)	-	12.0 (5.0, 26.0)	24.0 (12.0, 38.0)
""" during 3L (only for 2L cohort), n	1635	126	216	152	45	63	51	130	17	1	834	26	2.83239e-59
Mean (SD)	17.3 (20.5)	17.6 (18.0)	19.8 (28.5)	14.0 (16.0)	11.7 (9.4)	17.3 (21.9)	17.8 (19.1)	17.0 (21.3)	16.0 (15.8)	1.0 (-)	17.5 (19.5)	22.9 (16.2)
Median (Q1, Q3)	11.0 (4.0, 23.0)	12.5 (5.0, 23.0)	10.0 (3.5, 26.5)	8.0 (4.0, 18.5)	8.0 (5.0, 16.0)	8.0 (4.0, 23.0)	12.0 (3.0, 23.0)	11.0 (3.0, 21.0)	8.0 (6.0, 25.0)	1.0 (1.0, 1.0)	11.0 (5.0, 24.0)	19.0 (13.0, 30.0)
""" during 4L, n	905	84	139	83	24	39	37	65	10	0	424	9	6.72445e-73	634	60	49	67	22	40	28	18	6	1	343	31	3.88156e-55
Mean (SD)	13.8 (16.0)	11.5 (11.3)	15.0 (18.3)	10.9 (11.9)	23.3 (33.1)	17.8 (22.0)	15.6 (17.4)	10.2 (9.6)	18.2 (17.2)	-	13.8 (15.0)	15.8 (16.9)		14.3 (15.5)	13.9 (17.8)	10.7 (13.5)	14.5 (14.0)	22.7 (28.8)	9.4 (12.0)	14.6 (14.4)	16.7 (18.8)	25.2 (13.1)	3.0 (-)	14.6 (14.5)	23.1 (20.4)
Median (Q1, Q3)	8.0 (3.0, 19.0)	7.5 (4.0, 16.0)	8.0 (3.0, 20.0)	7.0 (3.0, 15.0)	13.0 (4.5, 22.5)	8.0 (3.0, 26.0)	6.0 (3.0, 23.0)	7.0 (3.0, 16.0)	14.0 (4.0, 28.0)	-	8.0 (3.0, 20.0)	9.0 (4.0, 17.0)		9.0 (3.0, 20.0)	9.0 (4.0, 15.5)	5.0 (2.0, 15.0)	10.0 (4.0, 21.0)	16.0 (6.0, 28.0)	5.0 (2.0, 9.0)	10.5 (3.5, 20.5)	7.0 (2.0, 33.0)	27.5 (17.0, 34.0)	3.0 (3.0, 3.0)	10.0 (4.0, 21.0)	23.0 (5.0, 31.0)
""" during 5L, n	468	36	72	41	13	15	15	33	6	0	237	2	1.68372e-30	362	33	31	38	7	28	15	9	5	0	196	11	2.81191e-27
Mean (SD)	14.6 (19.7)	11.0 (16.6)	18.6 (21.2)	12.0 (15.3)	11.8 (10.8)	13.7 (19.1)	17.3 (25.5)	12.0 (13.1)	15.3 (10.4)	-	14.8 (21.2)	13.5 (17.7)		13.5 (16.5)	12.8 (11.1)	16.7 (19.1)	10.8 (17.3)	20.9 (23.1)	10.8 (14.9)	16.4 (16.1)	23.0 (18.4)	14.0 (8.3)	-	13.2 (16.6)	10.4 (7.9)
Median (Q1, Q3)	7.0 (3.0, 19.0)	4.5 (2.0, 12.0)	11.0 (4.0, 23.5)	7.0 (2.0, 12.0)	9.0 (3.0, 19.0)	9.0 (2.0, 13.0)	5.0 (2.0, 37.0)	6.0 (2.0, 18.0)	18.0 (5.0, 23.0)	-	7.0 (3.0, 19.0)	13.5 (1.0, 26.0)		7.0 (3.0, 19.0)	10.0 (3.0, 21.0)	10.0 (2.0, 27.0)	5.0 (2.0, 9.0)	6.0 (5.0, 40.0)	4.0 (1.0, 13.5)	10.0 (6.0, 23.0)	20.0 (2.0, 40.0)	16.0 (8.0, 21.0)	-	6.0 (3.0, 18.0)	7.0 (3.0, 16.0)
""" during 6L+, n	269	26	45	25	8	8	11	16	4	0	126	1	4.86604e-20	222	18	21	22	4	12	8	6	4	1	126	5	3.16202e-65
Mean (SD)	22.1 (25.4)	19.1 (23.1)	24.4 (30.2)	19.1 (18.6)	22.3 (27.7)	20.9 (20.8)	26.3 (32.4)	15.2 (22.2)	35.5 (15.0)	-	22.7 (25.6)	36.0 (-)		22.0 (24.9)	14.8 (14.2)	23.8 (28.3)	18.4 (19.4)	43.0 (32.2)	15.4 (17.7)	37.3 (39.8)	17.7 (23.7)	46.0 (44.1)	5.0 (-)	21.9 (24.5)	37.8 (49.9)
Median (Q1, Q3)	13.0 (5.0, 30.0)	8.5 (4.0, 29.0)	9.0 (4.0, 30.0)	12.0 (5.0, 28.0)	15.0 (9.5, 19.5)	13.0 (6.0, 33.5)	9.0 (2.0, 51.0)	9.5 (2.5, 13.0)	31.5 (26.5, 44.5)	-	14.5 (5.0, 30.0)	36.0 (36.0, 36.0)		13.0 (4.0, 30.0)	8.5 (3.0, 20.0)	13.0 (4.0, 36.0)	13.0 (5.0, 26.0)	33.5 (21.5, 64.5)	8.5 (4.0, 23.0)	16.0 (8.5, 72.5)	7.5 (1.0, 28.0)	41.0 (11.5, 80.5)	5.0 (5.0, 5.0)	13.0 (4.0, 32.0)	19.0 (19.0, 22.0)
Number of inpatient admissions
""" during follow-up, n	2833	216	313	265	82	140	80	296	26	3	1412	59	3.0927e-33	1057	90	73	106	35	91	41	38	14	1	568	77	2.50594e-12
Mean (SD)	5.1 (3.8)	5.8 (3.5)	5.8 (3.3)	5.6 (4.0)	5.2 (4.7)	6.0 (3.7)	5.3 (3.6)	5.3 (3.7)	6.6 (5.4)	4.3 (2.5)	4.5 (3.9)	2.9 (2.7)		5.0 (3.9)	6.0 (3.8)	5.4 (3.0)	5.9 (4.3)	5.1 (3.1)	5.7 (5.1)	5.6 (2.9)	5.1 (3.0)	5.6 (4.0)	6.0 (-)	4.5 (3.8)	3.2 (2.6)
Median (Q1, Q3)	4.0 (2.0, 7.0)	5.0 (3.0, 8.0)	5.0 (3.0, 7.0)	5.0 (3.0, 7.0)	4.0 (2.0, 7.0)	5.0 (3.0, 8.0)	5.0 (3.0, 6.0)	5.0 (2.0, 7.0)	5.0 (2.0, 8.0)	4.0 (2.0, 7.0)	3.0 (2.0, 6.0)	2.0 (1.0, 4.0)		4.0 (2.0, 7.0)	5.0 (3.0, 8.0)	5.0 (3.0, 7.0)	5.0 (3.0, 8.0)	5.0 (3.0, 6.0)	5.0 (3.0, 7.0)	5.0 (3.0, 7.0)	5.0 (2.0, 8.0)	4.5 (2.0, 8.0)	6.0 (6.0, 6.0)	3.0 (2.0, 6.0)	2.0 (1.0, 5.0)
""" during index treatment, n	2757	216	313	261	79	140	80	295	26	3	1344	59	1.25639e-32	1020	90	73	105	34	91	41	37	14	1	534	77	3.2692e-13
Mean (SD)	2.9 (1.9)	3.3 (1.7)	3.1 (1.4)	3.3 (2.1)	3.2 (2.1)	3.7 (2.0)	2.8 (1.7)	3.6 (2.2)	3.2 (1.9)	3.3 (1.2)	2.5 (1.8)	1.8 (1.2)		2.7 (1.9)	3.1 (1.9)	3.1 (1.9)	3.1 (1.9)	3.1 (2.1)	3.5 (1.9)	3.1 (1.3)	3.4 (2.0)	3.1 (1.9)	3.0 (-)	2.3 (1.8)	1.9 (1.1)
Median (Q1, Q3)	2.0 (2.0, 4.0)	3.0 (2.0, 4.0)	3.0 (2.0, 4.0)	3.0 (2.0, 5.0)	3.0 (1.0, 5.0)	3.0 (2.0, 5.0)	2.0 (2.0, 4.0)	3.0 (2.0, 5.0)	3.0 (1.0, 5.0)	4.0 (2.0, 4.0)	2.0 (1.0, 3.0)	1.0 (1.0, 2.0)		2.0 (1.0, 4.0)	3.0 (2.0, 4.0)	3.0 (2.0, 4.0)	3.0 (2.0, 4.0)	3.0 (1.0, 5.0)	3.0 (2.0, 5.0)	3.0 (2.0, 4.0)	3.0 (2.0, 5.0)	2.5 (2.0, 4.0)	3.0 (3.0, 3.0)	2.0 (1.0, 3.0)	2.0 (1.0, 3.0)
""" during 3L (only for 2L cohort), n	1884	160	259	188	48	89	66	156	20	2	896	26	0.340732
Mean (SD)	2.4 (1.7)	2.4 (1.6)	2.3 (1.4)	2.4 (1.7)	2.2 (1.9)	2.8 (1.7)	2.2 (1.1)	2.5 (1.7)	2.3 (1.5)	2.5 (2.1)	2.4 (1.8)	2.3 (1.6)
Median (Q1, Q3)	2.0 (1.0, 3.0)	2.0 (1.0, 3.0)	2.0 (1.0, 3.0)	2.0 (1.0, 3.0)	1.0 (1.0, 3.0)	2.0 (1.0, 4.0)	2.0 (1.0, 3.0)	2.0 (1.0, 3.0)	2.0 (1.0, 3.0)	2.5 (1.0, 4.0)	2.0 (1.0, 3.0)	2.0 (1.0, 3.0)
""" during 4L, n	1148	114	175	116	33	54	45	90	16	1	504	13	0.924337	727	70	58	81	22	47	31	25	11	1	381	37	0.0501444
Mean (SD)	2.2 (1.8)	2.2 (1.3)	2.3 (1.4)	2.0 (1.4)	2.3 (1.8)	2.4 (1.6)	2.2 (1.9)	2.2 (2.2)	2.1 (2.0)	1.0 (-)	2.2 (2.0)	2.2 (2.2)		2.4 (2.0)	3.0 (2.0)	2.2 (1.1)	2.6 (2.0)	2.9 (1.9)	2.2 (1.3)	2.5 (1.7)	2.3 (1.5)	1.7 (0.9)	2.0 (-)	2.4 (2.2)	2.1 (1.3)
Median (Q1, Q3)	2.0 (1.0, 3.0)	2.0 (1.0, 3.0)	2.0 (1.0, 3.0)	2.0 (1.0, 2.0)	2.0 (1.0, 3.0)	2.0 (1.0, 3.0)	2.0 (1.0, 3.0)	2.0 (1.0, 2.0)	1.0 (1.0, 2.0)	1.0 (1.0, 1.0)	2.0 (1.0, 3.0)	2.0 (1.0, 2.0)		2.0 (1.0, 3.0)	2.0 (1.0, 4.0)	2.0 (1.0, 3.0)	2.0 (1.0, 3.0)	3.0 (1.0, 4.0)	2.0 (1.0, 3.0)	2.0 (1.0, 3.0)	2.0 (1.0, 3.0)	1.0 (1.0, 3.0)	2.0 (2.0, 2.0)	2.0 (1.0, 3.0)	2.0 (1.0, 3.0)
""" during 5L, n	658	57	103	65	18	31	29	46	8	1	300	4	0.189934	490	44	40	55	14	37	23	12	8	1	256	19	0.248595
Mean (SD)	2.1 (2.3)	1.8 (1.1)	2.1 (1.6)	1.9 (1.3)	2.1 (1.5)	2.1 (1.0)	1.9 (1.1)	2.2 (1.4)	3.0 (2.5)	1.0 (-)	2.3 (3.0)	1.5 (1.0)		2.1 (1.7)	2.0 (1.4)	2.0 (1.2)	2.1 (1.3)	1.6 (0.8)	2.7 (3.9)	1.9 (1.0)	2.6 (1.6)	2.9 (2.4)	3.0 (-)	2.1 (1.5)	2.5 (1.9)
Median (Q1, Q3)	2.0 (1.0, 3.0)	1.0 (1.0, 2.0)	2.0 (1.0, 3.0)	1.0 (1.0, 2.0)	1.5 (1.0, 2.0)	2.0 (1.0, 3.0)	2.0 (1.0, 3.0)	2.0 (1.0, 3.0)	2.0 (1.0, 4.5)	1.0 (1.0, 1.0)	2.0 (1.0, 3.0)	1.0 (1.0, 2.0)		2.0 (1.0, 3.0)	2.0 (1.0, 2.5)	2.0 (1.0, 2.5)	2.0 (1.0, 3.0)	1.0 (1.0, 2.0)	2.0 (1.0, 3.0)	2.0 (1.0, 3.0)	2.0 (1.5, 4.0)	2.0 (1.0, 4.0)	3.0 (3.0, 3.0)	2.0 (1.0, 3.0)	2.0 (1.0, 3.0)
""" during 6L+, n	354	29	54	37	14	17	15	26	5	0	157	2	0.0280981	286	22	26	30	8	22	12	8	4	1	153	7	0.313087
Mean (SD)	3.0 (2.7)	3.2 (3.1)	2.5 (2.2)	3.3 (3.9)	2.6 (2.8)	2.6 (2.0)	2.6 (1.6)	3.3 (2.7)	5.4 (3.0)	-	3.0 (2.6)	3.0 (1.4)		3.0 (2.8)	3.2 (2.8)	2.5 (1.9)	3.3 (3.5)	2.4 (1.8)	3.6 (3.6)	2.6 (1.6)	2.5 (1.8)	3.5 (2.9)	1.0 (-)	3.0 (2.8)	3.7 (1.3)
Median (Q1, Q3)	2.0 (1.0, 4.0)	2.0 (1.0, 3.0)	1.5 (1.0, 4.0)	2.0 (1.0, 4.0)	1.0 (1.0, 4.0)	2.0 (1.0, 4.0)	2.0 (1.0, 3.0)	2.0 (1.0, 4.0)	6.0 (4.0, 7.0)	-	2.0 (1.0, 4.0)	3.0 (2.0, 4.0)		2.0 (1.0, 4.0)	2.0 (1.0, 5.0)	2.0 (1.0, 3.0)	2.0 (1.0, 4.0)	1.5 (1.0, 3.5)	2.0 (1.0, 5.0)	2.5 (1.0, 3.5)	2.0 (1.0, 3.5)	3.5 (1.0, 6.0)	1.0 (1.0, 1.0)	2.0 (1.0, 4.0)	4.0 (4.0, 4.0)
Length of stay (among hospitalized patients), days
""" during follow-up, n	2833	216	313	265	82	140	80	296	26	3	1412	59	6.33726e-13	1057	90	73	106	35	91	41	38	14	1	568	77	0.0138489
Mean (SD)	140.0 (107.3)	169.6 (106.3)	168.2 (90.8)	146.9 (110.0)	129.0 (121.6)	161.6 (108.5)	167.5 (95.5)	134.4 (111.2)	188.5 (126.6)	203.7 (98.6)	125.0 (105.8)	90.2 (84.9)		144.9 (113.9)	159.2 (100.0)	182.4 (116.9)	148.7 (111.2)	111.7 (92.1)	141.4 (97.9)	151.3 (81.5)	146.3 (109.4)	236.4 (166.4)	105.0 (-)	137.0 (118.7)	99.6 (83.3)
Median (Q1, Q3)	116.0 (60.0, 192.0)	155.5 (96.0, 221.0)	152.0 (103.0, 214.0)	121.0 (70.0, 192.0)	99.0 (37.0, 147.0)	136.0 (88.5, 212.5)	146.5 (103.0, 211.0)	111.0 (56.0, 179.0)	160.5 (99.0, 244.0)	173.0 (124.0, 314.0)	97.0 (44.0, 176.0)	51.0 (33.0, 116.0)		118.0 (59.0, 199.0)	146.0 (81.0, 205.0)	168.0 (108.0, 228.0)	138.5 (63.0, 207.0)	82.0 (39.0, 170.0)	105.0 (72.0, 200.0)	136.0 (100.0, 188.0)	119.5 (64.0, 195.0)	159.0 (97.0, 402.0)	105.0 (105.0, 105.0)	106.0 (45.0, 191.0)	64.0 (37.0, 149.0)
""" during index treatment, n	2757	216	313	261	79	140	80	295	26	3	1344	59	1.14642e-26	1020	90	73	105	34	91	41	37	14	1	534	77	8.20268e-07
Mean (SD)	57.7 (46.1)	71.6 (43.0)	70.0 (39.5)	62.5 (44.3)	51.1 (41.2)	74.8 (46.5)	62.4 (36.2)	64.9 (49.0)	77.9 (62.0)	97.3 (28.3)	48.0 (45.9)	40.1 (20.2)		54.2 (44.8)	58.4 (41.6)	70.4 (45.9)	57.0 (41.7)	46.2 (35.7)	63.3 (34.0)	64.9 (46.2)	63.5 (54.6)	103.0 (82.6)	37.0 (-)	46.9 (44.0)	45.2 (35.5)
Median (Q1, Q3)	45.0 (25.0, 80.0)	62.0 (41.5, 93.5)	62.0 (45.0, 88.0)	52.0 (27.0, 89.0)	43.0 (16.0, 74.0)	64.0 (38.0, 96.0)	50.0 (36.0, 83.0)	54.0 (30.0, 90.0)	57.5 (41.0, 87.0)	105.0 (66.0, 121.0)	34.0 (20.0, 64.0)	34.0 (29.0, 47.0)		41.0 (24.0, 72.0)	48.0 (32.0, 73.0)	59.0 (37.0, 94.0)	52.0 (23.0, 79.0)	34.5 (25.0, 65.0)	62.0 (36.0, 81.0)	46.0 (31.0, 79.0)	44.0 (30.0, 83.0)	76.5 (59.0, 114.0)	37.0 (37.0, 37.0)	33.0 (20.0, 58.0)	34.0 (26.0, 44.0)
""" during 3L (only for 2L cohort), n	1884	160	259	188	48	89	66	156	20	2	896	26	0.397253
Mean (SD)	49.8 (41.8)	50.4 (37.5)	45.6 (37.3)	52.8 (42.0)	41.3 (38.5)	54.4 (37.3)	50.2 (38.5)	47.4 (38.4)	56.0 (52.2)	86.0 (28.3)	50.4 (44.6)	52.6 (35.4)
Median (Q1, Q3)	38.0 (22.0, 67.0)	41.0 (25.0, 72.0)	32.0 (24.0, 55.0)	44.5 (22.5, 72.5)	27.0 (12.0, 66.0)	46.0 (26.0, 71.0)	36.0 (26.0, 65.0)	36.5 (22.0, 63.0)	49.5 (32.5, 66.5)	86.0 (66.0, 106.0)	38.0 (21.0, 68.0)	46.5 (22.0, 85.0)
""" during 4L, n	1148	114	175	116	33	54	45	90	16	1	504	13	0.166066	727	70	58	81	22	47	31	25	11	1	381	37	0.336193
Mean (SD)	48.1 (44.2)	57.6 (47.9)	46.9 (34.2)	48.9 (46.4)	55.7 (54.4)	49.8 (40.7)	47.4 (39.1)	38.5 (30.1)	48.5 (55.0)	80.0 (-)	47.1 (47.5)	57.9 (62.1)		52.5 (50.3)	61.9 (51.6)	49.6 (36.1)	56.2 (58.8)	58.7 (49.7)	43.6 (34.0)	53.3 (45.4)	48.5 (35.1)	56.9 (62.7)	5.0 (-)	51.3 (52.6)	48.4 (39.5)
Median (Q1, Q3)	36.0 (21.0, 64.5)	43.5 (26.0, 75.0)	37.0 (22.0, 67.0)	37.5 (16.0, 71.0)	35.0 (17.0, 91.0)	35.0 (22.0, 63.0)	33.0 (26.0, 50.0)	33.0 (16.0, 53.0)	25.0 (20.0, 55.5)	80.0 (80.0, 80.0)	35.0 (20.0, 61.0)	32.0 (18.0, 81.0)		38.0 (22.0, 70.0)	56.5 (24.0, 81.0)	37.5 (23.0, 62.0)	42.0 (22.0, 73.0)	48.0 (30.0, 80.0)	33.0 (20.0, 63.0)	37.0 (21.0, 77.0)	46.0 (23.0, 65.0)	36.0 (15.0, 57.0)	5.0 (5.0, 5.0)	35.0 (21.0, 66.0)	44.0 (22.0, 60.0)
""" during 5L, n	658	57	103	65	18	31	29	46	8	1	300	4	0.85226	490	44	40	55	14	37	23	12	8	1	256	19	0.176304
Mean (SD)	43.8 (43.0)	38.4 (25.9)	42.4 (33.7)	40.4 (45.6)	56.5 (40.3)	44.7 (23.7)	43.5 (32.0)	40.5 (38.5)	50.6 (44.7)	57.0 (-)	45.4 (50.7)	67.5 (34.8)		45.6 (43.8)	44.5 (32.6)	45.1 (26.8)	40.2 (38.6)	40.1 (27.0)	52.3 (47.8)	30.7 (26.6)	63.9 (65.4)	79.4 (99.1)	37.0 (-)	45.8 (45.9)	47.9 (35.5)
Median (Q1, Q3)	34.0 (19.0, 57.0)	35.0 (21.0, 53.0)	32.0 (16.0, 64.0)	31.0 (16.0, 49.0)	43.5 (30.0, 94.0)	40.0 (31.0, 61.0)	33.0 (24.0, 49.0)	30.0 (14.0, 54.0)	34.5 (19.5, 80.0)	57.0 (57.0, 57.0)	34.0 (18.0, 57.5)	66.0 (37.5, 97.5)		35.5 (19.0, 59.0)	37.5 (19.5, 66.0)	39.5 (30.5, 59.0)	31.0 (16.0, 49.0)	36.0 (17.0, 63.0)	43.0 (22.0, 61.0)	19.0 (16.0, 42.0)	38.5 (22.0, 95.5)	62.5 (10.5, 86.0)	37.0 (37.0, 37.0)	35.5 (19.0, 61.0)	34.0 (24.0, 70.0)
""" during 6L+, n	354	29	54	37	14	17	15	26	5	0	157	2	0.021878	286	22	26	30	8	22	12	8	4	1	153	7	0.159359
Mean (SD)	84.2 (83.0)	92.3 (91.7)	67.0 (69.3)	77.1 (93.3)	71.6 (78.0)	88.4 (94.6)	57.7 (53.7)	146.5 (138.2)	90.6 (67.8)	-	83.0 (68.7)	55.5 (23.3)		87.2 (85.8)	89.4 (97.1)	94.9 (111.1)	74.3 (70.6)	40.5 (28.8)	91.8 (59.7)	45.9 (47.0)	112.0 (85.4)	99.8 (75.3)	22.0 (-)	91.9 (89.4)	118.7 (49.6)
Median (Q1, Q3)	56.0 (28.0, 116.0)	82.0 (22.0, 124.0)	43.0 (21.0, 94.0)	49.0 (19.0, 94.0)	43.5 (14.0, 115.0)	45.0 (34.0, 120.0)	37.0 (21.0, 101.0)	98.5 (64.0, 191.0)	113.0 (46.0, 118.0)	-	64.0 (35.0, 115.0)	55.5 (39.0, 72.0)		62.5 (30.0, 119.0)	60.0 (25.0, 116.0)	63.0 (43.0, 119.0)	46.5 (33.0, 90.0)	40.0 (19.0, 50.5)	94.0 (46.0, 139.0)	33.0 (9.0, 64.5)	84.5 (46.0, 170.0)	107.0 (51.0, 148.5)	22.0 (22.0, 22.0)	64.0 (31.0, 120.0)	124.0 (94.0, 127.0)
Number of emergency room visits
""" during follow-up, n	127	2	6	24	3	5	3	15	0	0	69	1	0.0790278	55	2	0	2	1	6	2	4	0	0	38	0	0.595765
Mean (SD)	2.2 (2.5)	1.0 (0.0)	1.2 (0.4)	2.5 (3.1)	2.3 (1.5)	3.6 (3.8)	1.0 (0.0)	2.1 (1.8)	-	-	2.3 (2.6)	1.0 (-)		2.0 (1.7)	1.0 (0.0)	-	2.5 (2.1)	1.0 (-)	1.5 (1.2)	2.0 (1.4)	3.0 (2.4)	-	-	2.0 (1.7)	-
Median (Q1, Q3)	1.0 (1.0, 2.0)	1.0 (1.0, 1.0)	1.0 (1.0, 1.0)	1.0 (1.0, 2.5)	2.0 (1.0, 4.0)	2.0 (1.0, 4.0)	1.0 (1.0, 1.0)	1.0 (1.0, 3.0)	-	-	1.0 (1.0, 2.0)	1.0 (1.0, 1.0)		1.0 (1.0, 3.0)	1.0 (1.0, 1.0)	-	2.5 (1.0, 4.0)	1.0 (1.0, 1.0)	1.0 (1.0, 1.0)	2.0 (1.0, 3.0)	2.5 (1.0, 5.0)	-	-	1.0 (1.0, 2.0)	-
""" during index treatment, n	54	0	0	12	2	3	0	7	0	0	30	0	0.444165	24	0	0	1	1	3	0	1	0	0	18	0	0.748771
Mean (SD)	1.7 (2.1)	-	-	2.3 (3.5)	1.5 (0.7)	1.0 (0.0)	-	1.7 (1.9)	-	-	1.6 (1.5)	-		2.0 (1.9)	-	-	1.0 (-)	1.0 (-)	2.0 (1.7)	-	1.0 (-)	-	-	2.1 (2.0)	-
Median (Q1, Q3)	1.0 (1.0, 2.0)	-	-	1.0 (1.0, 1.5)	1.5 (1.0, 2.0)	1.0 (1.0, 1.0)	-	1.0 (1.0, 1.0)	-	-	1.0 (1.0, 2.0)	-		1.0 (1.0, 2.5)	-	-	1.0 (1.0, 1.0)	1.0 (1.0, 1.0)	1.0 (1.0, 4.0)	-	1.0 (1.0, 1.0)	-	-	1.0 (1.0, 3.0)	-
""" during 3L (only for 2L cohort), n	43	0	3	8	0	1	2	3	0	0	26	1	0.00105618
Mean (SD)	2.4 (3.0)	-	1.0 (0.0)	2.0 (2.4)	-	10.0 (-)	1.0 (0.0)	1.7 (1.2)	-	-	2.6 (3.2)	1.0 (-)
Median (Q1, Q3)	1.0 (1.0, 3.0)	-	1.0 (1.0, 1.0)	1.0 (1.0, 1.5)	-	10.0 (10.0, 10.0)	1.0 (1.0, 1.0)	1.0 (1.0, 3.0)	-	-	1.0 (1.0, 3.0)	1.0 (1.0, 1.0)
""" during 4L, n	23	2	2	2	1	1	1	5	0	0	9	0	0.849378	15	1	0	0	0	0	2	2	0	0	10	0	0.179313
Mean (SD)	1.8 (1.6)	1.0 (0.0)	1.0 (0.0)	1.5 (0.7)	2.0 (-)	3.0 (-)	1.0 (-)	2.2 (2.2)	-	-	1.9 (2.0)	-		1.6 (1.4)	1.0 (-)	-	-	-	-	2.0 (1.4)	3.5 (3.5)	-	-	1.2 (0.4)	-
Median (Q1, Q3)	1.0 (1.0, 2.0)	1.0 (1.0, 1.0)	1.0 (1.0, 1.0)	1.5 (1.0, 2.0)	2.0 (2.0, 2.0)	3.0 (3.0, 3.0)	1.0 (1.0, 1.0)	1.0 (1.0, 2.0)	-	-	1.0 (1.0, 1.0)	-		1.0 (1.0, 2.0)	1.0 (1.0, 1.0)	-	-	-	-	2.0 (1.0, 3.0)	3.5 (1.0, 6.0)	-	-	1.0 (1.0, 1.0)	-
""" during 5L, n	13	0	1	2	0	1	0	1	0	0	8	0	0.0288839	11	0	0	1	0	2	0	2	0	0	6	0	0.422034
Mean (SD)	2.5 (2.4)	-	1.0 (-)	6.0 (2.8)	-	1.0 (-)	-	3.0 (-)	-	-	1.9 (2.1)	-		2.1 (1.9)	-	-	4.0 (-)	-	1.0 (0.0)	-	2.0 (1.4)	-	-	2.2 (2.4)	-
Median (Q1, Q3)	1.0 (1.0, 3.0)	-	1.0 (1.0, 1.0)	6.0 (4.0, 8.0)	-	1.0 (1.0, 1.0)	-	3.0 (3.0, 3.0)	-	-	1.0 (1.0, 1.5)	-		1.0 (1.0, 3.0)	-	-	4.0 (4.0, 4.0)	-	1.0 (1.0, 1.0)	-	2.0 (1.0, 3.0)	-	-	1.0 (1.0, 2.0)	-
""" during 6L+, n	10	0	1	2	1	1	0	0	0	0	5	0	0.928624	10	1	0	0	0	1	0	0	0	0	8	0	0.856441
Mean (SD)	1.4 (0.7)	-	1.0 (-)	1.0 (0.0)	2.0 (-)	1.0 (-)	-	-	-	-	1.6 (0.9)	-		1.4 (0.7)	1.0 (-)	-	-	-	1.0 (-)	-	-	-	-	1.5 (0.8)	-
Median (Q1, Q3)	1.0 (1.0, 2.0)	-	1.0 (1.0, 1.0)	1.0 (1.0, 1.0)	2.0 (2.0, 2.0)	1.0 (1.0, 1.0)	-	-	-	-	1.0 (1.0, 2.0)	-		1.0 (1.0, 2.0)	1.0 (1.0, 1.0)	-	-	-	1.0 (1.0, 1.0)	-	-	-	-	1.0 (1.0, 2.0)	-
Number of ICU admissions
""" during follow-up, n	83	3	7	8	0	6	3	6	2	0	48	0	0.999991	30	0	3	3	0	2	2	0	0	0	20	1	0.999511
Mean (SD)	1.1 (0.2)	1.0 (0.0)	1.0 (0.0)	1.1 (0.4)	-	1.0 (0.0)	1.0 (0.0)	1.0 (0.0)	1.0 (0.0)	-	1.1 (0.3)	-		1.1 (0.3)	-	1.0 (0.0)	1.0 (0.0)	-	1.0 (0.0)	1.0 (0.0)	-	-	-	1.1 (0.3)	1.0 (-)
Median (Q1, Q3)	1.0 (1.0, 1.0)	1.0 (1.0, 1.0)	1.0 (1.0, 1.0)	1.0 (1.0, 1.0)	-	1.0 (1.0, 1.0)	1.0 (1.0, 1.0)	1.0 (1.0, 1.0)	1.0 (1.0, 1.0)	-	1.0 (1.0, 1.0)	-		1.0 (1.0, 1.0)	-	1.0 (1.0, 1.0)	1.0 (1.0, 1.0)	-	1.0 (1.0, 1.0)	1.0 (1.0, 1.0)	-	-	-	1.0 (1.0, 1.0)	1.0 (1.0, 1.0)
""" during index treatment, n	34	0	0	6	0	3	1	5	1	0	18	0	0.999696	14	0	1	1	0	0	0	0	0	0	12	1	1
Mean (SD)	1.0 (0.2)	-	-	1.2 (0.4)	-	1.0 (0.0)	1.0 (-)	1.0 (0.0)	1.0 (-)	-	1.0 (0.0)	-		1.0 (0.0)	-	1.0 (-)	1.0 (-)	-	-	-	-	-	-	1.0 (0.0)	1.0 (-)
Median (Q1, Q3)	1.0 (1.0, 1.0)	-	-	1.0 (1.0, 1.0)	-	1.0 (1.0, 1.0)	1.0 (1.0, 1.0)	1.0 (1.0, 1.0)	1.0 (1.0, 1.0)	-	1.0 (1.0, 1.0)	-		1.0 (1.0, 1.0)	-	1.0 (1.0, 1.0)	1.0 (1.0, 1.0)	-	-	-	-	-	-	1.0 (1.0, 1.0)	1.0 (1.0, 1.0)
""" during 3L (only for 2L cohort), n	30	1	4	2	0	2	1	1	0	0	19	0	1
Mean (SD)	1.0 (0.0)	1.0 (-)	1.0 (0.0)	1.0 (0.0)	-	1.0 (0.0)	1.0 (-)	1.0 (-)	-	-	1.0 (0.0)	-
Median (Q1, Q3)	1.0 (1.0, 1.0)	1.0 (1.0, 1.0)	1.0 (1.0, 1.0)	1.0 (1.0, 1.0)	-	1.0 (1.0, 1.0)	1.0 (1.0, 1.0)	1.0 (1.0, 1.0)	-	-	1.0 (1.0, 1.0)	-
""" during 4L, n	13	2	0	0	0	0	2	0	1	0	8	0	0.982304	10	0	1	0	0	2	1	0	0	0	6	0	0.973084
Mean (SD)	1.2 (0.4)	1.0 (0.0)	-	-	-	-	1.0 (0.0)	-	1.0 (-)	-	1.3 (0.5)	-		1.2 (0.4)	-	1.0 (-)	-	-	1.0 (0.0)	1.0 (-)	-	-	-	1.3 (0.5)	-
Median (Q1, Q3)	1.0 (1.0, 1.0)	1.0 (1.0, 1.0)	-	-	-	-	1.0 (1.0, 1.0)	-	1.0 (1.0, 1.0)	-	1.0 (1.0, 1.5)	-		1.0 (1.0, 1.0)	-	1.0 (1.0, 1.0)	-	-	1.0 (1.0, 1.0)	1.0 (1.0, 1.0)	-	-	-	1.0 (1.0, 2.0)	-
""" during 5L, n	7	0	2	0	0	1	0	0	0	0	4	0	1	5	0	0	0	0	0	2	0	0	0	3	0
Mean (SD)	1.0 (0.0)	-	1.0 (0.0)	-	-	1.0 (-)	-	-	-	-	1.0 (0.0)	-		1.0 (0.0)	-	-	-	-	-	1.0 (0.0)	-	-	-	1.0 (0.0)	-
Median (Q1, Q3)	1.0 (1.0, 1.0)	-	1.0 (1.0, 1.0)	-	-	1.0 (1.0, 1.0)	-	-	-	-	1.0 (1.0, 1.0)	-		1.0 (1.0, 1.0)	-	-	-	-	-	1.0 (1.0, 1.0)	-	-	-	1.0 (1.0, 1.0)	-
""" during 6L+, n	4	0	1	0	0	0	0	0	0	0	3	0		3	0	1	2	0	0	0	0	0	0	0	0
Mean (SD)	1.0 (0.0)	-	1.0 (-)	-	-	-	-	-	-	-	1.0 (0.0)	-		1.0 (0.0)	-	1.0 (-)	1.0 (0.0)	-	-	-	-	-	-	-	-
Median (Q1, Q3)	1.0 (1.0, 1.0)	-	1.0 (1.0, 1.0)	-	-	-	-	-	-	-	1.0 (1.0, 1.0)	-		1.0 (1.0, 1.0)	-	1.0 (1.0, 1.0)	1.0 (1.0, 1.0)	-	-	-	-	-	-	-	-
Number of lines of therapy, n (%)													2.14098e-07
1																										0.608992
2	859 (29.3)	42 (19.4)	47 (15.0)	68 (25.2)	30 (35.3)	50 (35.7)	10 (12.5)	122 (40.1)	5 (19.2)	1 (33.3)	484 (32.5)	29 (49.2)
3	803 (27.4)	51 (23.6)	83 (26.5)	77 (28.5)	17 (20.0)	32 (22.9)	24 (30.0)	81 (26.6)	5 (19.2)	1 (33.3)	432 (29.0)	17 (28.8)		286 (26.4)	18 (20.0)	13 (17.8)	19 (17.9)	10 (27.8)	41 (45.1)	7 (17.1)	13 (32.5)	3 (21.4)	-	162 (27.3)	36 (46.8)
4	542 (18.5)	59 (27.3)	72 (23.0)	53 (19.6)	18 (21.2)	26 (18.6)	16 (20.0)	51 (16.8)	7 (26.9)	-	240 (16.1)	9 (15.3)		268 (24.7)	25 (27.8)	14 (19.2)	30 (28.3)	10 (27.8)	11 (12.1)	11 (26.8)	13 (32.5)	3 (21.4)	-	151 (25.5)	21 (27.3)
5	342 (11.7)	31 (14.4)	52 (16.6)	34 (12.6)	5 (5.9)	15 (10.7)	14 (17.5)	23 (7.6)	4 (15.4)	1 (33.3)	163 (10.9)	2 (3.4)		224 (20.6)	24 (26.7)	18 (24.7)	25 (23.6)	8 (22.2)	17 (18.7)	10 (24.4)	6 (15.0)	3 (21.4)	-	113 (19.1)	13 (16.9)
6+	381 (13.0)	33 (15.3)	59 (18.8)	38 (14.1)	15 (17.6)	17 (12.1)	16 (20.0)	27 (8.9)	5 (19.2)	-	171 (11.5)	2 (3.4)		307 (28.3)	23 (25.6)	28 (38.4)	32 (30.2)	8 (22.2)	22 (24.2)	13 (31.7)	8 (20.0)	5 (35.7)	1 (100.0)	167 (28.2)	7 (9.1)
Number of radiation therapy procedures
""" during follow-up, n	830	79	94	81	14	38	30	85	7	1	401	9	7.37347e-18	293	41	27	30	9	23	15	12	4	0	132	22	0.0017628
Mean (SD)	22.0 (12.5)	24.7 (13.2)	21.6 (11.2)	23.4 (12.4)	27.0 (14.5)	19.8 (8.1)	20.3 (7.9)	21.3 (11.5)	23.0 (11.9)	1.0 (-)	21.6 (13.3)	18.8 (3.4)		22.6 (13.1)	23.0 (12.6)	22.0 (12.1)	23.1 (13.1)	23.0 (14.3)	20.4 (11.9)	26.4 (17.5)	20.8 (13.9)	29.5 (10.8)	-	22.4 (13.3)	22.5 (13.0)
Median (Q1, Q3)	20.0 (15.0, 25.0)	24.0 (16.0, 29.0)	20.0 (15.0, 25.0)	20.0 (15.0, 28.0)	25.0 (20.0, 35.0)	20.0 (17.0, 23.0)	20.0 (15.0, 25.0)	20.0 (15.0, 25.0)	20.0 (14.0, 25.0)	1.0 (1.0, 1.0)	20.0 (15.0, 25.0)	20.0 (18.0, 20.0)		20.0 (15.0, 26.0)	22.0 (15.0, 30.0)	20.0 (15.0, 25.0)	20.0 (15.0, 25.0)	25.0 (10.0, 29.0)	20.0 (13.0, 25.0)	20.0 (17.0, 28.0)	15.5 (15.0, 24.0)	26.5 (22.5, 36.5)	-	20.0 (15.0, 25.0)	20.0 (15.0, 22.0)
""" during index treatment, n	407	44	24	39	8	18	7	49	2	0	216	5	2.89301e-06	136	19	12	19	3	10	6	6	2	0	59	15	0.0293871
Mean (SD)	19.2 (9.1)	22.1 (7.4)	18.1 (7.9)	18.3 (6.8)	19.3 (7.1)	18.1 (6.1)	15.6 (7.3)	17.4 (8.0)	25.0 (0.0)	-	19.4 (10.4)	19.0 (2.2)		19.3 (10.0)	19.7 (12.1)	20.1 (8.2)	20.3 (10.2)	23.3 (15.3)	18.2 (7.1)	24.5 (11.0)	17.5 (4.2)	22.5 (3.5)	-	18.3 (10.4)	20.3 (3.2)
Median (Q1, Q3)	20.0 (15.0, 25.0)	20.0 (17.0, 25.0)	15.5 (12.5, 25.0)	20.0 (15.0, 22.0)	20.0 (17.5, 25.0)	20.0 (17.0, 22.0)	15.0 (15.0, 22.0)	17.0 (15.0, 23.0)	25.0 (25.0, 25.0)	-	20.0 (15.0, 25.0)	20.0 (20.0, 20.0)		20.0 (15.0, 25.0)	22.0 (10.0, 25.0)	20.0 (16.5, 25.0)	20.0 (12.0, 25.0)	20.0 (10.0, 40.0)	20.0 (15.0, 20.0)	23.0 (20.0, 28.0)	15.0 (15.0, 20.0)	22.5 (20.0, 25.0)	-	19.0 (12.0, 20.0)	20.0 (19.0, 22.0)
""" during 3L (only for 2L cohort), n	281	26	45	30	2	11	9	31	1	0	126	2	8.34019e-07
Mean (SD)	17.9 (9.0)	15.0 (8.4)	18.4 (6.6)	21.5 (9.5)	22.5 (17.7)	19.5 (9.0)	15.8 (7.4)	16.9 (7.5)	20.0 (-)	-	17.7 (9.8)	15.5 (3.5)
Median (Q1, Q3)	19.0 (11.0, 23.0)	13.5 (10.0, 22.0)	20.0 (15.0, 23.0)	20.0 (15.0, 26.0)	22.5 (10.0, 35.0)	20.0 (10.0, 25.0)	18.0 (13.0, 20.0)	15.0 (10.0, 25.0)	20.0 (20.0, 20.0)	-	18.0 (11.0, 20.0)	15.5 (13.0, 18.0)
""" during 4L, n	146	18	22	13	2	7	8	10	3	0	63	1	1.19905e-05	90	14	8	7	4	4	6	3	0	0	44	7	4.92929e-06
Mean (SD)	17.1 (10.6)	17.1 (9.0)	14.3 (8.3)	16.5 (8.9)	13.0 (17.0)	14.6 (6.2)	23.3 (9.0)	15.2 (7.9)	18.0 (10.6)	-	18.0 (12.8)	18.0 (-)		18.9 (11.5)	22.9 (14.0)	15.3 (10.6)	23.7 (19.4)	13.0 (13.9)	18.8 (5.4)	20.2 (4.7)	20.7 (4.0)		-	17.8 (10.4)	17.1 (5.6)
Median (Q1, Q3)	16.0 (10.0, 22.0)	15.0 (10.0, 24.0)	16.0 (8.0, 20.0)	16.0 (10.0, 20.0)	13.0 (1.0, 25.0)	15.0 (10.0, 20.0)	25.0 (16.5, 26.0)	15.5 (10.0, 20.0)	14.0 (10.0, 30.0)	-	17.0 (10.0, 22.0)	18.0 (18.0, 18.0)		17.5 (12.0, 25.0)	19.0 (15.0, 27.0)	12.0 (9.5, 17.5)	20.0 (11.0, 25.0)	13.0 (1.0, 25.0)	19.0 (15.0, 22.5)	20.0 (16.0, 25.0)	23.0 (16.0, 23.0)		-	17.0 (11.5, 23.5)	19.0 (13.0, 20.0)
""" during 5L, n	89	10	16	10	3	3	6	6	1	1	33	1	6.71694e-17	63	11	5	3	3	9	4	2	1	0	25	2	1.09109e-08
Mean (SD)	16.3 (11.3)	11.1 (7.3)	16.0 (9.8)	21.3 (16.5)	24.0 (18.5)	13.0 (9.8)	18.3 (9.6)	24.2 (14.7)	20.0 (-)	1.0 (-)	14.7 (9.5)	25.0 (-)		17.5 (11.1)	14.6 (7.5)	18.0 (14.3)	11.0 (6.6)	16.7 (8.5)	18.1 (10.8)	12.8 (11.6)	18.5 (16.3)	45.0 (-)	-	19.0 (11.6)	2.0 (1.4)
Median (Q1, Q3)	15.0 (8.0, 24.0)	10.0 (5.0, 16.0)	20.0 (7.5, 24.5)	16.5 (10.0, 40.0)	17.0 (10.0, 45.0)	10.0 (5.0, 24.0)	19.0 (17.0, 25.0)	27.5 (13.0, 36.0)	20.0 (20.0, 20.0)	1.0 (1.0, 1.0)	15.0 (8.0, 20.0)	25.0 (25.0, 25.0)		17.0 (10.0, 25.0)	18.0 (7.0, 20.0)	22.0 (6.0, 25.0)	10.0 (5.0, 18.0)	17.0 (8.0, 25.0)	24.0 (10.0, 25.0)	12.5 (3.0, 22.5)	18.5 (7.0, 30.0)	45.0 (45.0, 45.0)	-	15.0 (12.0, 22.0)	2.0 (1.0, 3.0)
""" during 6L+, n	78	7	12	6	4	5	4	7	1	0	32	0	0.00252589	63	6	9	6	3	4	3	3	1	0	28	3	1.09766e-09
Mean (SD)	18.5 (12.5)	24.1 (17.1)	16.2 (9.9)	17.7 (13.4)	20.3 (11.6)	14.2 (8.6)	15.5 (10.6)	19.1 (11.1)	17.0 (-)	-	19.0 (14.0)	-		19.0 (12.5)	15.0 (13.5)	15.7 (7.1)	18.0 (4.6)	11.7 (14.2)	12.5 (5.3)	25.7 (23.8)	15.3 (12.9)	28.0 (-)	-	22.2 (13.9)	22.0 (18.5)
Median (Q1, Q3)	16.0 (10.0, 25.0)	26.0 (11.0, 35.0)	13.5 (9.5, 22.0)	18.0 (5.0, 28.0)	25.0 (14.0, 26.5)	20.0 (10.0, 20.0)	15.0 (7.0, 24.0)	20.0 (6.0, 30.0)	17.0 (17.0, 17.0)	-	15.0 (10.0, 20.5)	-		17.0 (10.0, 25.0)	10.5 (5.0, 28.0)	15.0 (10.0, 16.0)	20.0 (15.0, 21.0)	4.0 (3.0, 28.0)	11.0 (9.0, 16.0)	14.0 (10.0, 53.0)	10.0 (6.0, 30.0)	28.0 (28.0, 28.0)	-	20.0 (14.0, 26.5)	23.0 (3.0, 40.0)
Number of stem cell transplants
""" during follow-up, n	413	17	140	12	2	16	19	2	5	0	200	59	0.999993	215	15	29	6	1	12	7	3	5	0	137	77	0.999982
Mean (SD)	1.0 (0.2)	1.1 (0.2)	1.1 (0.2)	1.2 (0.6)	1.0 (0.0)	1.1 (0.3)	1.1 (0.2)	1.0 (0.0)	1.0 (0.0)	-	1.0 (0.2)	1.0 (0.1)		1.1 (0.3)	1.0 (0.0)	1.1 (0.3)	1.0 (0.0)	1.0 (-)	1.0 (0.0)	1.0 (0.0)	1.0 (0.0)	1.2 (0.4)	-	1.1 (0.3)	1.0 (0.1)
Median (Q1, Q3)	1.0 (1.0, 1.0)	1.0 (1.0, 1.0)	1.0 (1.0, 1.0)	1.0 (1.0, 1.0)	1.0 (1.0, 1.0)	1.0 (1.0, 1.0)	1.0 (1.0, 1.0)	1.0 (1.0, 1.0)	1.0 (1.0, 1.0)	-	1.0 (1.0, 1.0)	1.0 (1.0, 1.0)		1.0 (1.0, 1.0)	1.0 (1.0, 1.0)	1.0 (1.0, 1.0)	1.0 (1.0, 1.0)	1.0 (1.0, 1.0)	1.0 (1.0, 1.0)	1.0 (1.0, 1.0)	1.0 (1.0, 1.0)	1.0 (1.0, 1.0)	-	1.0 (1.0, 1.0)	1.0 (1.0, 1.0)
""" during index treatment, n	74	0	4	0	0	1	0	0	0	0	69	59	1	99	0	2	0	0	0	0	0	1	0	96	77	0.997545
Mean (SD)	1.0 (0.0)	-	1.0 (0.0)	-	-	1.0 (-)	-	-	-	-	1.0 (0.0)	1.0 (0.0)		1.0 (0.2)	-	1.0 (0.0)	-	-	-	-	-	1.0 (-)	-	1.0 (0.2)	1.0 (0.0)
Median (Q1, Q3)	1.0 (1.0, 1.0)	-	1.0 (1.0, 1.0)	-	-	1.0 (1.0, 1.0)	-	-	-	-	1.0 (1.0, 1.0)	1.0 (1.0, 1.0)		1.0 (1.0, 1.0)	-	1.0 (1.0, 1.0)	-	-	-	-	-	1.0 (1.0, 1.0)	-	1.0 (1.0, 1.0)	1.0 (1.0, 1.0)
""" during 3L (only for 2L cohort), n	203	12	92	6	1	7	11	0	3	0	71	1	0.999095
Mean (SD)	1.0 (0.2)	1.0 (0.0)	1.0 (0.0)	1.3 (0.8)	1.0 (-)	1.0 (0.0)	1.0 (0.0)	-	1.0 (0.0)	-	1.0 (0.2)	1.0 (-)
Median (Q1, Q3)	1.0 (1.0, 1.0)	1.0 (1.0, 1.0)	1.0 (1.0, 1.0)	1.0 (1.0, 1.0)	1.0 (1.0, 1.0)	1.0 (1.0, 1.0)	1.0 (1.0, 1.0)	-	1.0 (1.0, 1.0)	-	1.0 (1.0, 1.0)	1.0 (1.0, 1.0)
""" during 4L, n	87	3	29	4	1	6	5	2	2	0	35	0	1	73	6	17	5	1	7	7	3	3	0	24	0	1
Mean (SD)	1.0 (0.1)	1.0 (0.0)	1.0 (0.2)	1.0 (0.0)	1.0 (-)	1.0 (0.0)	1.0 (0.0)	1.0 (0.0)	1.0 (0.0)	-	1.0 (0.0)	-		1.0 (0.1)	1.0 (0.0)	1.1 (0.2)	1.0 (0.0)	1.0 (-)	1.0 (0.0)	1.0 (0.0)	1.0 (0.0)	1.0 (0.0)	-	1.0 (0.0)	-
Median (Q1, Q3)	1.0 (1.0, 1.0)	1.0 (1.0, 1.0)	1.0 (1.0, 1.0)	1.0 (1.0, 1.0)	1.0 (1.0, 1.0)	1.0 (1.0, 1.0)	1.0 (1.0, 1.0)	1.0 (1.0, 1.0)	1.0 (1.0, 1.0)	-	1.0 (1.0, 1.0)	-		1.0 (1.0, 1.0)	1.0 (1.0, 1.0)	1.0 (1.0, 1.0)	1.0 (1.0, 1.0)	1.0 (1.0, 1.0)	1.0 (1.0, 1.0)	1.0 (1.0, 1.0)	1.0 (1.0, 1.0)	1.0 (1.0, 1.0)	-	1.0 (1.0, 1.0)	-
""" during 5L, n	37	3	12	1	0	1	2	0	0	0	18	0	1	30	6	6	1	0	2	0	0	1	0	14	1	1
Mean (SD)	1.0 (0.0)	1.0 (0.0)	1.0 (0.0)	1.0 (-)	-	1.0 (-)	1.0 (0.0)	-	-	-	1.0 (0.0)	-		1.0 (0.0)	1.0 (0.0)	1.0 (0.0)	1.0 (-)	-	1.0 (0.0)	-	-	1.0 (-)	-	1.0 (0.0)	1.0 (-)
Median (Q1, Q3)	1.0 (1.0, 1.0)	1.0 (1.0, 1.0)	1.0 (1.0, 1.0)	1.0 (1.0, 1.0)	-	1.0 (1.0, 1.0)	1.0 (1.0, 1.0)	-	-	-	1.0 (1.0, 1.0)	-		1.0 (1.0, 1.0)	1.0 (1.0, 1.0)	1.0 (1.0, 1.0)	1.0 (1.0, 1.0)	-	1.0 (1.0, 1.0)	-	-	1.0 (1.0, 1.0)	-	1.0 (1.0, 1.0)	1.0 (1.0, 1.0)
""" during 6L+, n	24	0	8	1	0	2	2	0	0	0	11	0	0.99924	20	3	5	0	0	3	0	0	1	0	8	0	0.997705
Mean (SD)	1.0 (0.2)	-	1.1 (0.4)	1.0 (-)	-	1.0 (0.0)	1.0 (0.0)	-	-	-	1.0 (0.0)	-		1.1 (0.2)	1.0 (0.0)	1.2 (0.4)	-	-	1.0 (0.0)	-	-	1.0 (-)	-	1.0 (0.0)	-
Median (Q1, Q3)	1.0 (1.0, 1.0)	-	1.0 (1.0, 1.0)	1.0 (1.0, 1.0)	-	1.0 (1.0, 1.0)	1.0 (1.0, 1.0)	-	-	-	1.0 (1.0, 1.0)	-		1.0 (1.0, 1.0)	1.0 (1.0, 1.0)	1.0 (1.0, 1.0)	-	-	1.0 (1.0, 1.0)	-	-	1.0 (1.0, 1.0)	-	1.0 (1.0, 1.0)	-
*Only calculated for all regimens excluding Autologous SCT Conditioning Therapy

## Sheet: Supp Table 6
Supplementary Table 6. Age at SCT by age groups and line of therapy
	2L						3L
	2L Cohort			2L Auto-SCT Cohort			3L Cohort			3L Auto-SCT Cohort
	(n=2927)			(n=59)			(n=1085)			(n=77)
	All ASCT	Allo-SCT	Auto-SCT	All ASCT	Allo-SCT	Auto-SCT	All ASCT	Allo-SCT	Auto-SCT	All ASCT	Allo-SCT	Auto-SCT
Age at Stem Cell Transplant, n (%)
""" during index treatment, n	74	10	71	59	0	59	99	2	99	77	0	77
0-18	0 (0.0)	0 (0.0)	0 (0.0)	0 (0.0)	0 (-)	0 (0.0)	0 (0.0)	0 (0.0)	0 (0.0)	0 (0.0)	0 (-)	0 (0.0)
18-39	6 (8.1)	3 (30.0)	5 (7.0)	2 (3.4)	0 (-)	2 (3.4)	6 (6.1)	1 (50.0)	6 (6.1)	7 (9.1)	0 (-)	7 (9.1)
40-44	3 (4.1)	1 (10.0)	2 (2.8)	0 (0.0)	0 (-)	0 (0.0)	4 (4.0)	0 (0.0)	4 (4.0)	3 (3.9)	0 (-)	3 (3.9)
45-49	4 (5.4)	1 (10.0)	4 (5.6)	5 (8.5)	0 (-)	5 (8.5)	8 (8.1)	1 (50.0)	8 (8.1)	5 (6.5)	0 (-)	5 (6.5)
50-54	12 (16.2)	1 (10.0)	12 (16.9)	9 (15.3)	0 (-)	9 (15.3)	8 (8.1)	0 (0.0)	8 (8.1)	8 (10.4)	0 (-)	8 (10.4)
55-59	12 (16.2)	3 (30.0)	11 (15.5)	13 (22.0)	0 (-)	13 (22.0)	15 (15.2)	0 (0.0)	15 (15.2)	13 (16.9)	0 (-)	13 (16.9)
60-64	14 (18.9)	0 (0.0)	14 (19.7)	17 (28.8)	0 (-)	17 (28.8)	24 (24.2)	0 (0.0)	24 (24.2)	26 (33.8)	0 (-)	26 (33.8)
65-69	21 (28.4)	1 (10.0)	21 (29.6)	12 (20.3)	0 (-)	12 (20.3)	31 (31.3)	0 (0.0)	31 (31.3)	12 (15.6)	0 (-)	12 (15.6)
70-74	2 (2.7)	0 (0.0)	2 (2.8)	1 (1.7)	0 (-)	1 (1.7)	3 (3.0)	0 (0.0)	3 (3.0)	3 (3.9)	0 (-)	3 (3.9)
75-79	0 (0.0)	0 (0.0)	0 (0.0)	0 (0.0)	0 (-)	0 (0.0)	0 (0.0)	0 (0.0)	0 (0.0)	0 (0.0)	0 (-)	0 (0.0)
80+	0 (0.0)	0 (0.0)	0 (0.0)	0 (0.0)	0 (-)	0 (0.0)	0 (0.0)	0 (0.0)	0 (0.0)	0 (0.0)	0 (-)	0 (0.0)
""" during 3L (only for 2L cohort), n	203	1	203	1	1	1
0-18	0 (0.0)	0 (0.0)	0 (0.0)	0 (0.0)	0 (0.0)	0 (0.0)
18-39	14 (6.9)	1 (100.0)	14 (6.9)	0 (0.0)	0 (0.0)	0 (0.0)
40-44	8 (3.9)	0 (0.0)	8 (3.9)	0 (0.0)	0 (0.0)	0 (0.0)
45-49	12 (5.9)	0 (0.0)	12 (5.9)	1 (100.0)	1 (100.0)	1 (100.0)
50-54	20 (9.9)	0 (0.0)	20 (9.9)	0 (0.0)	0 (0.0)	0 (0.0)
55-59	30 (14.8)	0 (0.0)	30 (14.8)	0 (0.0)	0 (0.0)	0 (0.0)
60-64	64 (31.5)	0 (0.0)	64 (31.5)	0 (0.0)	0 (0.0)	0 (0.0)
65-69	49 (24.1)	0 (0.0)	49 (24.1)	0 (0.0)	0 (0.0)	0 (0.0)
70-74	6 (3.0)	0 (0.0)	6 (3.0)	0 (0.0)	0 (0.0)	0 (0.0)
75-79	0 (0.0)	0 (0.0)	0 (0.0)	0 (0.0)	0 (0.0)	0 (0.0)
80+	0 (0.0)	0 (0.0)	0 (0.0)	0 (0.0)	0 (0.0)	0 (0.0)
""" during 4L, n	87	4	85	0	0	0	73	3	72	0	0	0
0-18	0 (0.0)	0 (0.0)	0 (0.0)	0 (-)	0 (-)	0 (-)	0 (0.0)	0 (0.0)	0 (0.0)	0 (-)	0 (-)	0 (-)
18-39	6 (6.9)	3 (75.0)	5 (5.9)	0 (-)	0 (-)	0 (-)	5 (6.8)	2 (66.7)	5 (6.9)	0 (-)	0 (-)	0 (-)
40-44	5 (5.7)	0 (0.0)	5 (5.9)	0 (-)	0 (-)	0 (-)	5 (6.8)	0 (0.0)	5 (6.9)	0 (-)	0 (-)	0 (-)
45-49	8 (9.2)	0 (0.0)	8 (9.4)	0 (-)	0 (-)	0 (-)	7 (9.6)	0 (0.0)	7 (9.7)	0 (-)	0 (-)	0 (-)
50-54	8 (9.2)	0 (0.0)	8 (9.4)	0 (-)	0 (-)	0 (-)	8 (11.0)	0 (0.0)	8 (11.1)	0 (-)	0 (-)	0 (-)
55-59	17 (19.5)	0 (0.0)	17 (20.0)	0 (-)	0 (-)	0 (-)	15 (20.5)	0 (0.0)	15 (20.8)	0 (-)	0 (-)	0 (-)
60-64	16 (18.4)	0 (0.0)	16 (18.8)	0 (-)	0 (-)	0 (-)	10 (13.7)	0 (0.0)	10 (13.9)	0 (-)	0 (-)	0 (-)
65-69	22 (25.3)	1 (25.0)	21 (24.7)	0 (-)	0 (-)	0 (-)	18 (24.7)	1 (33.3)	17 (23.6)	0 (-)	0 (-)	0 (-)
70-74	4 (4.6)	0 (0.0)	4 (4.7)	0 (-)	0 (-)	0 (-)	4 (5.5)	0 (0.0)	4 (5.6)	0 (-)	0 (-)	0 (-)
75-79	0 (0.0)	0 (0.0)	0 (0.0)	0 (-)	0 (-)	0 (-)	0 (0.0)	0 (0.0)	0 (0.0)	0 (-)	0 (-)	0 (-)
80+	1 (1.1)	0 (0.0)	1 (1.2)	0 (-)	0 (-)	0 (-)	1 (1.4)	0 (0.0)	1 (1.4)	0 (-)	0 (-)	0 (-)
""" during 5L, n	37	5	36	0	0	0	30	3	30	1	1	1
0-18	0 (0.0)	0 (0.0)	0 (0.0)	0 (-)	0 (-)	0 (-)	0 (0.0)	0 (0.0)	0 (0.0)	0 (0.0)	0 (0.0)	0 (0.0)
18-39	6 (16.2)	0 (0.0)	6 (16.7)	0 (-)	0 (-)	0 (-)	5 (16.7)	0 (0.0)	5 (16.7)	0 (0.0)	0 (0.0)	0 (0.0)
40-44	3 (8.1)	1 (20.0)	3 (8.3)	0 (-)	0 (-)	0 (-)	3 (10.0)	1 (33.3)	3 (10.0)	0 (0.0)	0 (0.0)	0 (0.0)
45-49	3 (8.1)	1 (20.0)	3 (8.3)	0 (-)	0 (-)	0 (-)	2 (6.7)	1 (33.3)	2 (6.7)	0 (0.0)	0 (0.0)	0 (0.0)
50-54	4 (10.8)	1 (20.0)	3 (8.3)	0 (-)	0 (-)	0 (-)	3 (10.0)	0 (0.0)	3 (10.0)	1 (100.0)	1 (100.0)	1 (100.0)
55-59	4 (10.8)	0 (0.0)	4 (11.1)	0 (-)	0 (-)	0 (-)	3 (10.0)	0 (0.0)	3 (10.0)	0 (0.0)	0 (0.0)	0 (0.0)
60-64	11 (29.7)	1 (20.0)	11 (30.6)	0 (-)	0 (-)	0 (-)	11 (36.7)	1 (33.3)	11 (36.7)	0 (0.0)	0 (0.0)	0 (0.0)
65-69	4 (10.8)	1 (20.0)	4 (11.1)	0 (-)	0 (-)	0 (-)	3 (10.0)	0 (0.0)	3 (10.0)	0 (0.0)	0 (0.0)	0 (0.0)
70-74	2 (5.4)	0 (0.0)	2 (5.6)	0 (-)	0 (-)	0 (-)	0 (0.0)	0 (0.0)	0 (0.0)	0 (0.0)	0 (0.0)	0 (0.0)
75-79	0 (0.0)	0 (0.0)	0 (0.0)	0 (-)	0 (-)	0 (-)	0 (0.0)	0 (0.0)	0 (0.0)	0 (0.0)	0 (0.0)	0 (0.0)
80+	0 (0.0)	0 (0.0)	0 (0.0)	0 (-)	0 (-)	0 (-)	0 (0.0)	0 (0.0)	0 (0.0)	0 (0.0)	0 (0.0)	0 (0.0)
""" during 6L+, n	24	4	24	0	0	0	20	4	19	0	0	0
0-18	0 (0.0)	0 (0.0)	0 (0.0)	0 (-)	0 (-)	0 (-)	0 (0.0)	0 (0.0)	0 (0.0)	0 (-)	0 (-)	0 (-)
18-39	3 (12.5)	2 (50.0)	2 (8.7)	0 (-)	0 (-)	0 (-)	3 (15.0)	2 (50.0)	2 (10.5)	0 (-)	0 (-)	0 (-)
40-44	0 (0.0)	0 (0.0)	0 (0.0)	0 (-)	0 (-)	0 (-)	0 (0.0)	0 (0.0)	0 (0.0)	0 (-)	0 (-)	0 (-)
45-49	4 (16.7)	1 (25.0)	4 (17.4)	0 (-)	0 (-)	0 (-)	3 (15.0)	1 (25.0)	3 (15.8)	0 (-)	0 (-)	0 (-)
50-54	1 (4.2)	0 (0.0)	1 (4.3)	0 (-)	0 (-)	0 (-)	1 (5.0)	0 (0.0)	1 (5.3)	0 (-)	0 (-)	0 (-)
55-59	6 (25.0)	1 (25.0)	6 (26.1)	0 (-)	0 (-)	0 (-)	5 (25.0)	1 (25.0)	5 (26.3)	0 (-)	0 (-)	0 (-)
60-64	3 (12.5)	0 (0.0)	3 (13.0)	0 (-)	0 (-)	0 (-)	3 (15.0)	0 (0.0)	3 (15.8)	0 (-)	0 (-)	0 (-)
65-69	6 (25.0)	0 (0.0)	6 (26.1)	0 (-)	0 (-)	0 (-)	4 (20.0)	0 (0.0)	4 (21.1)	0 (-)	0 (-)	0 (-)
70-74	1 (4.2)	0 (0.0)	1 (4.3)	0 (-)	0 (-)	0 (-)	1 (5.0)	0 (0.0)	1 (5.3)	0 (-)	0 (-)	0 (-)
75-79	0 (0.0)	0 (0.0)	0 (0.0)	0 (-)	0 (-)	0 (-)	0 (0.0)	0 (0.0)	0 (0.0)	0 (-)	0 (-)	0 (-)
80+	0 (0.0)	0 (0.0)	0 (0.0)	0 (-)	0 (-)	0 (-)	0 (0.0)	0 (0.0)	0 (0.0)	0 (-)	0 (-)	0 (-)

## Sheet: Supp Table 7
Supplementary Table 7. Adjusted direct nominal medical costs during the follow-up period, by line of therapy and by index regimen.
		2L													3L
	All regimens	DeVIC-based +/- R	CHASE-based +/- R	GDP-based +/- R	R-Bendamustine-based	EPOCH-based +/- R	ESHAP-based +/- R	R-CVP-based	ICE-based +/- R	DHAP-based +/- R	Other chemotherapy +/- R	Autologous SCT conditioning therapy	P value*	All regimens	DeVIC-based +/- R	CHASE-based +/- R	GDP-based +/- R	R-Bendamustine-based	EPOCH-based +/- R	ESHAP-based +/- R	R-CVP-based	ICE-based +/- R	DHAP-based +/- R	Other chemotherapy +/- R	Autologous SCT conditioning therapy	P value*
	(n=2927)	(n=216)	(n=313)	(n=270)	(n=85)	(n=140)	(n=80)	(n=304)	(n=26)	(n=3)	(n=1490)	(n=59)		(n=1085)	(n=90)	(n=73)	(n=106)	(n=36)	(n=91)	(n=41)	(n=40)	(n=14)	(n=1)	(n=593)	(n=77)
Total cost, USD
""" during follow-up, n	2927	216	313	270	85	140	80	304	26	3	1490	59	5.90871e-25	1085	90	73	106	36	91	41	40	14	1	593	77	0.000201089
Mean (SD)	77173.5 (59643.2)	88870.4 (54287.5)	104413.8 (57851.9)	73061.9 (48923.2)	94724.7 (68698.7)	83913.9 (56504.7)	96814.3 (62302.0)	69341.3 (51445.7)	104163.1 (66961.2)	94515.1 (28215.4)	68903.6 (61075.8)	71456.8 (55460.3)		79118.0 (60657.0)	84649.5 (51306.3)	103887.9 (69616.8)	76701.5 (48458.2)	80581.6 (54278.4)	70539.9 (51735.8)	81340.7 (39638.9)	78116.6 (51820.9)	149504.0 (90845.3)	32884.1 (-)	75218.9 (63724.2)	73178.7 (50127.2)
Median (Q1, Q3)	62848.0 (36286.3, 99202.7)	78097.4 (51701.5, 111067.4)	88102.1 (64043.8, 127176.4)	59647.6 (38432.2, 90457.7)	68944.4 (47478.3, 122664.7)	65605.4 (46369.9, 110620.1)	83676.8 (54713.4, 121456.3)	57364.4 (33846.1, 83880.9)	84527.6 (55376.3, 139226.2)	99080.0 (64295.5, 120169.7)	53292.1 (27336.3, 90200.7)	51734.0 (36930.6, 86435.4)		62576.3 (36614.1, 105864.8)	69956.4 (48284.6, 112785.1)	87627.4 (62048.7, 119003.5)	69619.5 (42113.0, 100437.7)	64454.2 (43843.4, 92045.1)	53436.1 (34249.3, 101394.5)	72415.6 (45896.5, 106333.7)	66274.0 (42203.0, 94602.5)	135262.5 (77011.5, 189321.9)	32884.1 (32884.1, 32884.1)	55669.7 (30749.3, 101140.1)	52952.2 (35760.7, 97786.6)
""" during index treatment, n	2927	216	313	270	85	140	80	304	26	3	1490	59	6.89434e-35	1085	90	73	106	36	91	41	40	14	1	593	77	1.08242e-05
Mean (SD)	33210.1 (25559.1)	38324.0 (23165.9)	42161.5 (25309.3)	31753.9 (18981.9)	45494.2 (19157.6)	38972.3 (21989.0)	32960.6 (20426.8)	40142.2 (23766.4)	40971.6 (25475.5)	63625.5 (51285.2)	28012.4 (26777.7)	40753.8 (15075.3)		31414.6 (26109.8)	32409.4 (25532.5)	40687.9 (29400.9)	29601.5 (19107.4)	39911.7 (25973.9)	31725.4 (15649.6)	31502.3 (24955.1)	38145.5 (25332.4)	61397.2 (46343.0)	11359.5 (-)	28748.4 (26905.2)	40783.1 (21335.1)
Median (Q1, Q3)	28056.8 (15629.8, 44143.5)	33658.9 (21731.1, 49693.2)	38605.9 (26367.7, 53942.0)	28726.6 (16517.0, 42131.3)	42094.3 (33692.7, 54482.7)	33414.3 (22793.4, 52868.7)	26967.7 (15763.2, 44914.6)	33882.9 (25469.1, 49361.6)	34834.3 (21845.3, 54918.5)	50592.6 (20114.1, 120169.7)	20816.0 (11441.7, 36699.3)	37474.9 (30368.9, 49261.5)		25761.5 (14334.8, 40894.3)	25765.3 (18110.3, 38059.7)	33607.9 (19111.1, 55943.5)	26918.4 (15096.1, 38604.6)	35767.3 (23020.6, 50590.3)	31928.3 (15930.8, 41575.1)	22675.3 (15420.7, 40416.6)	32082.2 (21993.4, 46612.5)	43532.0 (30252.3, 102438.6)	11359.5 (11359.5, 11359.5)	22327.5 (11428.9, 37376.8)	34781.2 (27821.5, 43627.3)
""" during 3L (only for 2L cohort), n	2068	174	266	202	55	90	70	182	21	2	1006	30	0.0125816
Mean (SD)	28020.9 (24860.0)	27536.0 (23564.4)	30834.5 (23848.0)	26668.8 (22302.7)	25875.8 (24961.5)	31666.1 (24676.0)	30620.9 (26788.8)	22497.1 (20118.6)	32210.1 (29747.4)	27605.3 (19661.0)	28155.3 (26233.0)	37792.7 (41311.5)
Median (Q1, Q3)	22596.8 (12075.8, 36635.1)	21596.7 (13398.0, 35416.0)	25454.2 (14926.0, 40951.6)	20626.4 (10770.0, 36316.9)	16800.1 (6444.9, 40043.3)	26077.0 (15561.7, 41960.6)	23074.7 (13901.4, 35745.0)	15909.9 (9811.3, 29993.5)	25371.8 (16642.8, 38493.1)	27605.3 (13702.8, 41507.7)	23023.3 (11923.7, 36163.9)	27731.9 (13748.1, 48687.4)
""" during 4L, n	1265	123	183	125	38	58	46	101	16	1	574	13	0.0127407	799	72	60	87	26	50	34	27	11	1	431	41	0.408938
Mean (SD)	26833.3 (26007.0)	28226.4 (23231.0)	30197.6 (24329.5)	23739.9 (23633.6)	34067.3 (29122.6)	31439.3 (33079.2)	29240.6 (21749.0)	20307.1 (20475.8)	28023.7 (22991.5)	23685.6 (-)	26119.3 (27571.3)	36785.6 (36800.2)		28868.3 (28700.3)	32116.6 (25702.5)	30667.3 (24780.8)	28554.2 (26628.6)	33397.9 (37157.4)	23863.5 (18126.2)	31013.9 (26692.3)	27231.8 (23157.5)	39705.5 (32064.5)	4270.3 (-)	28159.7 (30869.5)	32801.0 (23428.9)
Median (Q1, Q3)	19976.4 (9819.9, 34695.6)	21448.9 (11944.5, 39891.1)	25028.2 (12101.2, 40085.3)	16038.2 (7645.6, 34665.5)	28193.4 (13856.7, 45048.2)	23399.3 (11033.0, 35362.3)	20795.1 (13617.8, 43825.4)	14711.3 (8164.5, 24438.2)	23700.2 (10420.6, 38928.6)	23685.6 (23685.6, 23685.6)	18918.9 (9453.9, 32800.9)	22211.1 (16854.0, 45736.9)		21329.0 (10685.6, 36376.3)	29091.6 (15951.5, 40344.3)	25849.6 (16104.2, 38053.1)	19976.4 (12330.0, 36588.1)	25977.6 (9819.9, 39463.2)	18035.7 (10384.1, 35362.3)	24008.5 (13128.6, 43471.5)	20364.1 (10460.8, 41290.4)	28816.4 (14059.8, 58582.1)	4270.3 (4270.3, 4270.3)	18893.5 (9101.6, 33992.6)	27967.4 (16245.0, 47150.3)
""" during 5L, n	723	64	111	72	20	32	30	50	9	1	334	4	0.000830841	531	47	46	57	16	39	23	14	8	1	280	20	0.10038
Mean (SD)	24736.2 (23728.5)	18803.7 (15350.6)	29014.8 (23093.7)	18376.8 (18314.1)	35880.7 (41138.1)	25744.9 (16538.7)	28769.3 (25746.3)	18188.0 (15665.8)	21030.0 (21969.3)	13772.7 (-)	25808.7 (25731.0)	33377.3 (18638.4)		24785.2 (22437.5)	26230.8 (20583.8)	26469.0 (22747.8)	20206.7 (15935.3)	17094.4 (11362.1)	29173.8 (24836.9)	24378.7 (20082.8)	28903.3 (24945.1)	48498.4 (44052.6)	11199.3 (-)	24224.7 (22857.8)	28032.4 (19860.6)
Median (Q1, Q3)	18348.6 (9005.7, 33133.9)	14425.2 (7975.5, 27170.8)	25033.1 (10101.2, 43643.8)	13198.2 (7687.0, 25767.2)	27815.5 (17115.5, 41502.1)	22230.5 (14048.5, 34805.3)	18903.9 (13470.6, 36674.9)	14466.5 (6738.5, 23593.1)	17280.5 (8892.7, 20536.0)	13772.7 (13772.7, 13772.7)	18995.6 (9005.7, 34565.1)	29337.4 (21553.5, 45201.1)		19087.6 (9305.8, 33339.3)	22668.6 (10270.3, 33339.3)	19201.0 (10726.3, 38344.7)	16069.8 (6994.6, 28478.7)	17053.9 (8169.7, 23781.7)	25429.5 (13772.7, 37250.5)	17838.9 (8768.5, 36180.9)	18904.2 (10453.8, 38862.6)	41755.0 (13230.6, 73847.5)	11199.3 (11199.3, 11199.3)	18578.3 (9049.9, 31861.4)	18035.5 (12349.6, 42796.2)
""" during 6L+, n	381	33	59	38	15	17	16	27	5	0	171	2	0.461506	307	23	28	32	8	22	13	8	5	1	167	7	0.539973
Mean (SD)	49620.1 (49557.7)	43984.2 (45773.9)	42986.5 (41737.1)	38827.3 (40143.9)	49950.5 (49352.5)	46739.0 (36753.2)	47292.8 (58978.8)	67467.8 (64074.2)	65784.0 (58209.8)	-	52579.4 (51886.0)	32987.2 (17396.5)		50591.4 (49275.3)	50276.9 (44240.5)	55571.0 (59072.0)	42393.9 (40304.4)	40282.2 (43598.5)	54598.4 (38179.9)	32937.9 (29081.9)	57367.7 (45167.7)	81749.6 (88350.3)	6055.1 (-)	51720.0 (51499.2)	84138.4 (34278.3)
Median (Q1, Q3)	33060.7 (15179.3, 69145.4)	25421.9 (9217.9, 79529.0)	27704.7 (10850.5, 60729.9)	24140.5 (11883.0, 44430.1)	29405.0 (16981.2, 116994.6)	36833.0 (17286.3, 64474.3)	26570.3 (13135.9, 65427.5)	41810.8 (27664.5, 95039.1)	53090.0 (52479.5, 62677.5)	-	39699.4 (15973.3, 72851.5)	32987.2 (20686.0, 45288.3)		34511.6 (15179.3, 73403.1)	52915.7 (12484.9, 69145.4)	35953.7 (21649.1, 80045.4)	24419.8 (13110.0, 74105.8)	27413.4 (15265.6, 47923.3)	47723.3 (22382.6, 81473.7)	21387.1 (5546.5, 58376.7)	35790.0 (27431.4, 95875.9)	52479.5 (37589.6, 89080.7)	6055.1 (6055.1, 6055.1)	34511.6 (14434.4, 79824.4)	82644.2 (64391.9, 99818.2)
Inpatient costs, USD
""" during follow-up, n	2833	216	313	265	82	140	80	296	26	3	1412	59	6.28282e-25	1057	90	73	106	35	91	41	38	14	1	568	77	0.000174371
Mean (SD)	64547.1 (54326.9)	77035.5 (50966.8)	91424.2 (52411.8)	62173.9 (48221.5)	63897.5 (59979.8)	72332.6 (52308.8)	83880.6 (55580.8)	54759.0 (49127.9)	92817.1 (62798.2)	79973.7 (15829.5)	56793.1 (54347.8)	58625.0 (51781.8)		66798.9 (56591.0)	73439.1 (48540.8)	93183.7 (67220.9)	62580.3 (44809.9)	53452.9 (41435.9)	62811.1 (49568.6)	66959.8 (35942.5)	62890.8 (48183.2)	126549.9 (84188.8)	31374.3 (-)	63443.7 (59453.9)	59946.7 (44077.0)
Median (Q1, Q3)	50810.4 (25646.3, 86348.7)	68532.4 (38901.1, 99496.3)	78106.3 (55933.0, 113079.6)	48151.0 (28577.4, 81310.3)	45701.5 (22135.5, 86026.6)	56976.6 (36778.3, 92269.4)	70967.4 (48336.9, 104174.3)	43724.6 (22049.3, 71349.4)	79475.3 (45080.2, 112444.4)	79698.8 (64283.4, 95938.8)	41143.4 (18631.4, 75354.2)	34483.4 (27105.0, 73093.0)		51174.6 (26944.8, 89461.3)	62508.4 (33828.5, 102022.3)	75038.1 (51228.5, 115517.0)	56561.7 (27145.3, 89248.9)	47092.2 (23260.6, 68436.4)	50339.8 (26976.2, 96191.2)	59225.0 (39232.1, 82971.8)	54895.7 (21816.7, 88799.3)	118836.2 (42312.4, 187240.2)	31374.3 (31374.3, 31374.3)	44282.3 (21487.6, 85653.3)	41118.3 (26587.2, 81935.8)
""" during index treatment, n	2757	216	313	261	79	140	80	295	26	3	1344	59	5.21743e-29	1020	90	73	105	34	91	41	37	14	1	534	77	3.91359e-05
Mean (SD)	28354.9 (23089.3)	34290.9 (21348.0)	39272.4 (22612.1)	26293.3 (18993.9)	29224.8 (22109.0)	33927.4 (20783.2)	30418.0 (19816.5)	30412.0 (24056.5)	38416.6 (24670.3)	49352.4 (30978.7)	23811.2 (23118.1)	32843.6 (10646.6)		26965.7 (23239.4)	28444.5 (23612.7)	37002.9 (24092.1)	23801.8 (17102.3)	24556.5 (16900.2)	27987.0 (14967.2)	28529.1 (21349.9)	29622.0 (27068.4)	55211.3 (45063.8)	11359.5 (-)	24930.4 (23922.3)	33817.5 (18949.5)
Median (Q1, Q3)	22590.6 (11798.3, 39229.7)	28997.2 (18558.5, 44890.5)	36046.2 (25284.1, 49928.4)	21919.7 (12089.6, 37559.7)	22135.5 (11022.7, 42047.2)	27206.0 (18614.5, 44080.5)	25002.5 (14982.1, 40514.5)	25554.0 (14541.6, 39217.9)	33998.5 (21090.2, 54918.5)	50580.6 (17778.0, 79698.8)	16496.5 (8787.6, 32189.6)	31311.4 (25551.9, 35944.6)		21550.5 (11562.8, 34950.9)	22135.0 (14541.4, 32780.2)	29791.8 (18385.6, 50801.7)	22760.7 (10630.4, 34195.2)	21915.0 (10914.0, 28632.7)	26384.0 (15370.5, 36363.7)	21617.7 (15420.7, 37031.9)	21592.3 (16321.7, 39664.6)	34583.4 (30252.3, 68604.5)	11359.5 (11359.5, 11359.5)	18672.1 (9521.4, 32245.6)	29036.2 (22820.4, 38426.7)
""" during 3L (only for 2L cohort), n	1884	160	259	188	48	89	66	156	20	2	896	26	0.132235
Mean (SD)	24734.7 (21526.9)	24483.0 (19266.6)	26458.9 (19825.8)	24227.1 (21958.6)	22646.7 (23475.4)	27891.4 (23215.5)	27689.0 (23895.2)	20698.5 (17358.8)	30191.8 (30097.6)	27202.7 (19091.7)	24543.8 (22212.5)	35696.0 (44590.5)
Median (Q1, Q3)	19642.5 (10404.5, 32522.0)	20356.0 (11624.4, 32262.6)	21401.5 (14532.3, 33927.9)	17714.6 (8696.2, 31894.0)	15604.0 (5560.3, 33534.9)	23443.0 (13196.8, 36325.5)	20844.8 (12010.9, 34018.1)	15733.1 (8714.1, 27345.9)	25960.2 (18412.0, 33765.4)	27202.7 (13702.8, 40702.6)	19460.1 (10022.5, 31945.0)	23294.7 (9803.5, 40116.0)
""" during 4L, n	1148	114	175	116	33	54	45	90	16	1	504	13	0.0530767	727	70	58	81	22	47	31	25	11	1	381	37	0.586302
Mean (SD)	24425.5 (23737.5)	26621.1 (22719.5)	27031.6 (21971.0)	22746.6 (23210.8)	27321.0 (29415.0)	27250.8 (24955.3)	23904.0 (18194.3)	17530.6 (15924.2)	24533.2 (23246.6)	23685.6 (-)	24194.0 (25574.8)	31340.2 (29082.1)		26176.3 (26246.9)	28133.8 (22012.4)	28477.3 (23504.2)	25739.8 (24481.8)	28948.8 (28214.0)	22155.5 (17666.0)	28692.5 (23876.5)	23860.9 (19196.8)	34272.6 (32693.0)	3668.3 (-)	25667.5 (28854.6)	27156.9 (19859.1)
Median (Q1, Q3)	18672.4 (8972.7, 31725.6)	21342.1 (10418.3, 36070.3)	22105.3 (10684.4, 37664.8)	15872.1 (7920.5, 30719.4)	16817.7 (6219.6, 37680.5)	21770.1 (11602.8, 31460.9)	19017.7 (12478.5, 31396.2)	13559.9 (7023.9, 22508.5)	18110.7 (7842.5, 36973.8)	23685.6 (23685.6, 23685.6)	18615.4 (8795.5, 30992.3)	22211.1 (11826.5, 44387.1)		19698.9 (9877.1, 33050.0)	25387.4 (13721.7, 37020.5)	21381.0 (15057.3, 35529.9)	19246.4 (10418.3, 31237.5)	21165.5 (9405.0, 38772.7)	17186.4 (10259.8, 35362.3)	22703.9 (10927.2, 43361.2)	20364.1 (11632.5, 29300.4)	27913.2 (7462.2, 48270.3)	3668.3 (3668.3, 3668.3)	18658.3 (8396.6, 31038.7)	28305.0 (9851.3, 40311.5)
""" during 5L, n	658	57	103	65	18	31	29	46	8	1	300	4	0.0404216	490	44	40	55	14	37	23	12	8	1	256	19	0.0633413
Mean (SD)	22099.8 (20470.9)	18298.7 (13082.5)	26232.4 (22440.3)	17933.2 (18377.5)	24595.5 (13944.9)	22108.8 (12873.3)	26787.8 (26300.0)	16153.7 (13798.1)	21340.0 (21729.8)	13772.7 (-)	22661.8 (22171.7)	32469.8 (19050.8)		22675.9 (21266.9)	24679.4 (20386.0)	26013.3 (21674.6)	17735.6 (14110.2)	16155.5 (9500.1)	27044.1 (23428.4)	17960.7 (16649.3)	23054.4 (21013.7)	42153.4 (46762.5)	11199.3 (-)	22438.7 (21698.9)	26359.1 (19753.6)
Median (Q1, Q3)	16690.2 (8485.7, 29520.8)	14852.1 (8664.3, 23737.0)	18839.7 (8501.1, 38491.4)	13158.4 (6531.6, 23903.5)	23186.2 (16254.8, 35712.7)	20040.0 (12385.8, 28735.5)	16970.7 (10851.2, 33658.2)	12453.5 (6103.8, 22285.5)	16216.4 (10265.5, 22212.3)	13772.7 (13772.7, 13772.7)	16623.7 (8215.1, 29992.6)	27522.4 (19901.0, 45038.6)		17506.5 (8827.9, 29166.7)	18823.6 (11439.0, 31499.2)	20494.7 (12348.4, 35055.5)	14297.2 (6415.9, 25865.1)	17053.9 (7524.9, 22598.1)	23897.5 (13772.7, 33701.0)	12034.5 (6663.5, 25492.8)	14233.5 (10723.2, 35852.3)	27121.8 (6610.0, 70331.5)	11199.3 (11199.3, 11199.3)	16666.3 (9045.3, 29621.0)	16801.6 (11949.0, 50166.5)
""" during 6L+, n	354	29	54	37	14	17	15	26	5	0	157	2	0.271973	286	22	26	30	8	22	12	8	4	1	153	7	0.0668884
Mean (SD)	43800.0 (42899.6)	42679.9 (43230.0)	37744.4 (35278.6)	33907.5 (37430.5)	35676.8 (35831.4)	43380.4 (33783.6)	39800.8 (46078.7)	64897.2 (64234.7)	49465.3 (47888.0)	-	45898.8 (42719.5)	27850.6 (10132.3)		45315.1 (44580.7)	45193.1 (38487.6)	54191.6 (58728.4)	35798.1 (34798.1)	21610.0 (11934.4)	51229.7 (37471.7)	22758.1 (24376.7)	52582.3 (42546.6)	71128.7 (62028.9)	5147.2 (-)	47056.2 (46695.7)	72331.8 (36232.4)
Median (Q1, Q3)	28300.3 (14006.7, 61005.7)	26547.4 (8821.4, 68035.3)	24440.2 (11289.7, 57390.2)	19760.8 (7643.7, 44430.1)	22281.3 (16981.2, 29948.7)	36833.0 (16190.6, 61005.7)	16565.0 (10584.3, 89071.5)	39821.1 (27321.3, 90070.9)	48415.9 (20561.1, 51524.3)	-	32438.9 (15211.1, 63515.7)	27850.6 (20686.0, 35015.2)		29520.0 (14022.0, 67346.0)	40505.5 (14836.1, 68319.5)	32740.8 (21228.2, 67346.0)	21540.0 (12686.1, 49317.9)	24410.3 (12814.2, 29290.7)	47306.2 (22382.6, 78359.5)	12895.0 (5099.6, 38341.6)	35585.3 (19412.8, 93391.9)	68743.7 (24404.0, 117853.5)	5147.2 (5147.2, 5147.2)	30615.5 (14558.6, 68966.4)	60021.9 (51876.6, 97405.6)
ICU costs, USD
""" during follow-up, n	83	3	7	8	0	6	3	6	2	0	48	0	0.469985	30	0	3	3	0	2	2	0	0	0	20	1	0.680254
Mean (SD)	4783.3 (4230.4)	2997.7 (3745.2)	7400.5 (4781.8)	4869.4 (3292.3)	-	7984.7 (2675.7)	4025.0 (2525.6)	3821.7 (3563.1)	5170.0 (5799.9)	-	4250.2 (4473.1)	-		3547.3 (3434.7)	-	5660.9 (3402.6)	2298.1 (1794.0)	-	3461.7 (1631.0)	4771.7 (4509.4)	-	-	-	3303.7 (3750.5)	10293.3 (-)
Median (Q1, Q3)	3206.4 (1068.8, 7322.2)	861.8 (809.1, 7322.2)	6559.0 (3347.6, 11484.2)	4331.7 (2512.0, 6667.3)	-	8100.3 (7515.0, 10275.2)	4614.9 (1256.7, 6203.4)	2325.5 (861.8, 7475.6)	5170.0 (1068.8, 9271.2)	-	2409.6 (866.3, 5663.4)	-		2410.9 (866.3, 5198.1)	-	5198.1 (2513.3, 9271.2)	1723.6 (861.8, 4309.0)	-	3461.7 (2308.4, 4614.9)	4771.7 (1583.1, 7960.3)	-	-	-	1651.1 (849.4, 5109.8)	10293.3 (10293.3, 10293.3)
""" during index treatment, n	34	0	0	6	0	3	1	5	1	0	18	0	0.100972	14	0	1	1	0	0	0	0	0	0	12	1	0.39157
Mean (SD)	4138.7 (3565.2)	-	-	5207.3 (3729.1)	-	9500.3 (1733.1)	3957.7 (-)	4413.6 (3638.9)	1068.8 (-)	-	2993.1 (3109.8)	-		2825.7 (2201.5)	-	2513.3 (-)	861.8 (-)	-	-	-	-	-	-	3015.4 (2308.5)	10293.3 (-)
Median (Q1, Q3)	2535.1 (1068.8, 7018.1)	-	-	4890.9 (2510.7, 7018.1)	-	10275.2 (7515.0, 10710.7)	3957.7 (3957.7, 3957.7)	2513.3 (2137.6, 7475.6)	1068.8 (1068.8, 1068.8)	-	1498.0 (866.3, 3206.4)	-		2093.6 (861.8, 5198.1)	-	2513.3 (2513.3, 2513.3)	861.8 (861.8, 861.8)	-	-	-	-	-	-	2510.7 (851.6, 5430.8)	10293.3 (10293.3, 10293.3)
""" during 3L (only for 2L cohort), n	30	1	4	2	0	2	1	1	0	0	19	0	0.403943
Mean (SD)	4387.6 (4136.5)	861.8 (-)	6497.9 (5193.2)	3855.7 (1898.4)	-	5723.4 (3559.5)	2245.7 (-)	861.8 (-)	-	-	4342.6 (4394.3)	-
Median (Q1, Q3)	3186.3 (866.3, 6283.3)	861.8 (861.8, 861.8)	6820.5 (2107.0, 10888.8)	3855.7 (2513.3, 5198.1)	-	5723.4 (3206.4, 8240.3)	2245.7 (2245.7, 2245.7)	861.8 (861.8, 861.8)	-	-	3166.1 (866.3, 6283.3)	-
""" during 4L, n	13	2	0	0	0	0	2	0	1	0	8	0	0.711635	10	0	1	0	0	2	1	0	0	0	6	0	0.2103
Mean (SD)	4625.9 (3909.2)	4065.6 (4605.5)	-	-	-	-	2935.8 (2374.7)	-	9271.2 (-)	-	4607.8 (4286.3)	-		3443.3 (3554.2)	-	9271.2 (-)	-	-	3461.7 (1631.0)	791.5 (-)	-	-	-	2907.9 (3696.3)	-
Median (Q1, Q3)	2616.3 (1256.7, 7351.4)	4065.6 (809.1, 7322.2)	-	-	-	-	2935.8 (1256.7, 4614.9)	-	9271.2 (9271.2, 9271.2)	-	2462.4 (1218.8, 8839.6)	-		1968.4 (809.1, 4614.9)	-	9271.2 (9271.2, 9271.2)	-	-	3461.7 (2308.4, 4614.9)	791.5 (791.5, 791.5)	-	-	-	1442.6 (809.1, 2616.3)	-
""" during 5L, n	7	0	2	0	0	1	0	0	0	0	4	0	0.856664	5	0	0	0	0	0	2	0	0	0	3	0	-
Mean (SD)	5581.8 (4321.8)	-	5790.2 (1087.2)	-	-	7960.3 (-)	-	-	-	-	4883.0 (5864.8)	-		4238.8 (3283.8)	-	-	-	-	-	4375.9 (5069.1)	-	-	-	4147.4 (2947.5)	-
Median (Q1, Q3)	5021.5 (861.8, 7960.3)	-	5790.2 (5021.5, 6559.0)	-	-	7960.3 (7960.3, 7960.3)	-	-	-	-	2739.3 (826.7, 8939.4)	-		5021.5 (861.8, 6559.0)	-	-	-	-	-	4375.9 (791.5, 7960.3)	-	-	-	5021.5 (861.8, 6559.0)	-
""" during 6L+, n	4	0	1	0	0	0	0	0	0	0	3	0		3	0	1	2	0	0	0	0	0	0	0	0	-
Mean (SD)	6365.5 (5447.0)	-	14231.3 (-)	-	-	-	-	-	-	-	3743.6 (1804.9)	-		3743.6 (1804.9)	-	5198.1 (-)	3016.3 (1828.2)	-	-	-	-	-	-	-	-
Median (Q1, Q3)	4753.5 (3016.3, 9714.7)	-	14231.3 (14231.3, 14231.3)	-	-	-	-	-	-	-	4309.0 (1723.6, 5198.1)	-		4309.0 (1723.6, 5198.1)	-	5198.1 (5198.1, 5198.1)	3016.3 (1723.6, 4309.0)	-	-	-	-	-	-	-	-
Outpatient costs, USD
""" during follow-up, n	2842	209	300	255	82	133	75	299	25	3	1461	58	3.61093e-16	1053	87	72	102	35	89	40	40	13	1	574	77	8.33209e-10
Mean (SD)	15139.0 (22040.1)	12231.3 (14947.3)	13552.5 (15899.4)	12747.5 (12343.5)	34292.8 (39259.8)	12190.9 (17035.2)	13795.9 (18390.9)	16291.3 (17988.0)	11799.9 (14622.4)	14541.4 (22510.1)	15382.9 (24723.7)	13053.1 (10537.0)		14469.8 (20110.9)	11597.0 (12913.4)	10852.9 (13345.2)	14675.0 (18871.2)	29431.1 (37634.3)	7902.5 (10940.7)	14740.5 (20064.3)	18370.3 (17379.3)	24719.8 (24663.5)	1509.9 (-)	14928.2 (21031.5)	13232.0 (14734.0)
Median (Q1, Q3)	8487.7 (3818.9, 18215.0)	7388.3 (3713.0, 14676.1)	8452.0 (3744.9, 16479.5)	8660.2 (3000.9, 18159.4)	28174.0 (11751.2, 37165.8)	6777.7 (3208.2, 12765.9)	6836.4 (2367.4, 17790.5)	10964.3 (4887.6, 22191.9)	5336.4 (1854.1, 13134.4)	3141.2 (12.1, 40471.0)	8266.8 (3873.1, 17508.9)	9582.8 (6934.4, 15495.8)		7881.5 (3321.7, 16929.8)	6532.3 (3175.6, 14484.2)	7379.4 (2227.4, 14015.3)	9216.7 (3329.1, 20217.7)	18149.1 (2885.7, 38557.8)	4803.0 (2550.2, 8368.1)	6343.6 (2232.3, 17151.2)	14182.4 (5186.3, 28397.7)	18819.7 (6203.9, 40515.4)	1509.9 (1509.9, 1509.9)	8397.8 (4336.1, 16657.6)	8193.1 (4241.0, 18353.9)
""" during index treatment, n	2441	175	236	222	80	114	51	289	19	3	1252	55	1.97083e-40	921	71	57	84	32	79	33	35	10	0	520	76	2.25183e-12
Mean (SD)	7796.6 (11019.8)	4978.0 (6603.1)	3831.7 (6042.5)	7707.1 (7875.5)	19478.1 (12407.1)	6195.5 (7630.3)	3988.4 (6678.3)	11182.3 (10498.3)	3496.3 (5131.0)	14273.0 (22717.8)	7776.6 (12368.4)	8485.5 (8141.8)		7144.2 (11213.9)	5025.9 (8394.0)	4719.4 (10134.9)	7602.1 (9274.8)	18809.4 (26785.4)	4306.3 (4004.7)	3694.0 (5230.7)	12280.1 (12530.2)	8660.2 (13082.6)	-	7182.7 (10717.9)	7057.3 (6288.8)
Median (Q1, Q3)	4151.3 (1324.2, 10112.2)	3265.7 (880.8, 6594.6)	1683.9 (484.6, 4623.3)	4710.8 (1478.5, 11703.0)	20963.5 (7616.1, 29465.8)	3644.3 (1405.7, 7999.2)	976.6 (245.8, 5398.6)	7190.9 (3570.9, 17572.3)	882.9 (337.5, 6257.7)	2336.1 (12.1, 40471.0)	4133.1 (1441.7, 9944.1)	7081.7 (3315.5, 11327.0)		3580.5 (1250.5, 8517.5)	1684.2 (781.8, 5422.0)	1660.0 (603.7, 5370.0)	4198.2 (2036.4, 9400.9)	9409.6 (1428.3, 31069.9)	3371.2 (1350.9, 5900.8)	2099.3 (1057.6, 3011.7)	7784.4 (3218.1, 18308.3)	4005.8 (1728.9, 10859.9)	-	3734.5 (1435.4, 8777.8)	4759.6 (3014.0, 8754.1)
""" during 3L (only for 2L cohort), n	1635	126	216	152	45	63	51	130	17	1	834	26	0.0509526
Mean (SD)	6940.1 (13076.5)	6936.3 (9776.1)	6245.9 (11201.8)	5476.4 (7358.3)	7469.5 (11145.1)	5835.0 (8718.8)	6195.8 (8160.2)	6657.7 (10453.9)	4269.2 (4573.2)	805.1 (-)	7593.5 (15622.1)	7910.9 (7262.1)
Median (Q1, Q3)	3286.0 (1119.7, 8020.7)	3544.9 (1217.5, 9345.7)	3173.8 (1001.8, 7016.1)	2534.2 (825.8, 6527.1)	2800.9 (1575.8, 6692.6)	1856.2 (954.8, 7627.7)	2795.6 (1212.4, 6495.1)	2908.2 (947.5, 7828.6)	2151.2 (1111.8, 4622.9)	805.1 (805.1, 805.1)	3631.7 (1250.5, 8755.7)	5877.7 (3059.4, 9239.3)
""" during 4L, n	905	84	139	83	24	39	37	65	10	0	424	9	6.24379e-05	634	60	49	67	22	40	28	18	6	1	343	31	0.01582
Mean (SD)	6523.4 (12043.4)	5202.8 (9619.8)	5724.0 (9806.5)	3962.5 (5494.9)	16373.5 (16691.2)	9024.0 (17186.8)	7280.8 (10416.0)	7280.9 (16661.3)	5584.9 (6810.7)	-	6600.7 (12353.0)	7865.5 (10534.5)		6365.4 (11790.1)	5717.1 (10443.7)	3844.0 (5272.6)	5959.5 (8200.8)	10521.5 (20559.0)	3796.8 (5195.9)	5893.1 (7028.2)	7707.4 (10705.6)	9960.4 (7642.6)	602.0 (-)	6873.2 (13360.8)	10968.9 (13467.1)
Median (Q1, Q3)	2530.1 (726.0, 7068.7)	2349.5 (912.0, 4994.6)	2152.3 (658.8, 6302.3)	2299.4 (752.0, 3921.4)	13523.0 (1239.6, 27591.7)	2161.1 (335.4, 10982.6)	2739.4 (778.9, 12621.7)	2208.4 (703.3, 7821.6)	2240.3 (1379.4, 10311.8)	-	2666.3 (692.7, 7032.8)	5027.5 (935.9, 7087.0)		2676.8 (785.7, 6600.0)	2269.0 (718.3, 7078.0)	1317.2 (391.6, 4693.9)	2715.4 (1005.5, 8347.8)	3899.8 (690.6, 10848.2)	1792.3 (564.4, 3859.1)	2336.0 (930.2, 9296.8)	2895.5 (481.0, 11701.3)	7952.8 (4874.6, 18819.7)	602.0 (602.0, 602.0)	2913.8 (934.9, 6342.6)	6291.1 (1145.1, 15271.3)
""" during 5L, n	468	36	72	41	13	15	15	33	6	0	237	2	0.000449134	362	33	31	38	7	28	15	9	5	0	196	11	0.0827772
Mean (SD)	7142.4 (16166.5)	4455.9 (11242.1)	7204.3 (8846.8)	3840.9 (4554.4)	21145.8 (54673.1)	9230.9 (18414.6)	5748.8 (9329.3)	5040.2 (10925.8)	3091.7 (2355.1)	-	7685.9 (16194.7)	1815.0 (2107.1)		5662.4 (9475.3)	4453.2 (4768.3)	5711.0 (9150.7)	4640.0 (10404.4)	6761.9 (7782.9)	4898.0 (7973.6)	9841.0 (17495.1)	14221.4 (21987.3)	10152.0 (17050.6)	-	5299.1 (8041.5)	5438.7 (6992.4)
Median (Q1, Q3)	2514.3 (796.0, 7014.6)	1159.5 (200.6, 3977.5)	4656.3 (1433.1, 8426.1)	2176.3 (372.9, 5172.3)	2314.5 (1700.4, 5992.5)	1903.2 (925.8, 7301.7)	2058.4 (639.6, 5973.4)	1223.7 (634.6, 4313.3)	3597.8 (294.6, 5064.2)	-	2775.4 (839.1, 8036.4)	1815.0 (325.1, 3305.0)		2316.2 (799.5, 6234.3)	3996.2 (799.1, 5477.7)	2722.2 (617.7, 6905.6)	1605.7 (409.2, 4440.5)	3584.9 (1480.8, 9803.0)	1850.6 (405.2, 5104.3)	2559.5 (2104.9, 6639.3)	7852.5 (830.1, 9371.4)	3152.8 (958.9, 5997.4)	-	2096.2 (858.0, 6328.4)	3515.3 (1087.2, 6675.9)
""" during 6L+, n	269	26	45	25	8	8	11	16	4	0	126	1	0.130442	222	18	21	22	4	12	8	6	4	1	126	5	0.0508676
Mean (SD)	12639.6 (25166.6)	8221.6 (11539.6)	11066.8 (16000.8)	8834.3 (10616.4)	31222.7 (44647.6)	7137.1 (7574.4)	14515.8 (25021.3)	8393.9 (20360.6)	20398.3 (15059.1)	-	14166.4 (30994.0)	10273.2 (-)		11583.1 (20460.7)	9006.8 (11393.0)	7000.3 (7980.9)	12848.3 (19518.0)	37344.4 (48825.8)	6175.8 (8102.7)	19386.9 (26327.1)	6380.5 (8026.1)	31058.3 (38248.9)	907.8 (-)	11409.9 (21487.9)	16529.2 (11836.2)
Median (Q1, Q3)	4172.1 (1174.5, 12281.7)	3068.5 (907.8, 9217.9)	4172.1 (1358.0, 18561.2)	5011.5 (1154.4, 10511.4)	9930.4 (3446.2, 57037.6)	3636.4 (1115.6, 12506.3)	4777.3 (1191.8, 13529.0)	1736.9 (425.3, 4422.3)	21841.1 (7608.4, 33188.3)	-	4541.5 (1547.5, 11529.3)	10273.2 (10273.2, 10273.2)		4206.0 (1174.5, 11529.3)	4836.6 (1174.5, 13466.3)	3120.2 (1358.0, 11381.9)	5308.7 (1110.0, 10829.4)	17769.3 (6241.0, 68447.8)	2814.0 (849.5, 7727.2)	12132.4 (1304.4, 24465.1)	2681.0 (15.6, 16030.3)	20826.6 (2036.5, 60080.1)	907.8 (907.8, 907.8)	3985.6 (1547.5, 10494.4)	22622.4 (7738.4, 25938.7)
Cancer treatment costs, USD
""" during follow-up, n	2927	216	313	270	85	140	80	304	26	3	1490	59	6.25547e-22	1085	90	73	106	36	91	41	40	14	1	593	77	4.25905e-06
Mean (SD)	16271.9 (19657.6)	16726.1 (12411.5)	18323.5 (13338.5)	15132.4 (12199.1)	41015.0 (36559.1)	15734.4 (12022.0)	17430.4 (15477.9)	16203.6 (15227.7)	20463.3 (14124.1)	12410.8 (5257.0)	14506.8 (21934.2)	6949.9 (7619.1)		15127.5 (17765.0)	15808.8 (12208.9)	15200.2 (11014.4)	16101.2 (18005.0)	33546.6 (32678.6)	12924.3 (9510.7)	15836.8 (13612.9)	17647.2 (15051.1)	24595.6 (15991.9)	4716.9 (-)	13636.1 (18618.7)	9256.9 (13004.4)
Median (Q1, Q3)	11954.3 (5447.7, 20902.1)	13043.3 (8546.2, 21586.5)	15185.7 (9209.5, 23492.7)	12123.0 (7106.9, 19171.7)	32196.7 (23152.3, 45933.5)	12994.9 (7355.6, 21211.7)	11898.5 (7962.9, 22467.0)	13405.8 (8970.2, 19194.8)	16235.5 (11023.2, 25956.0)	10963.1 (8029.4, 18239.9)	8957.2 (2605.2, 18972.3)	3897.7 (2271.7, 8750.8)		10624.7 (4887.1, 19417.9)	13081.1 (7628.3, 19291.2)	12694.5 (6717.6, 20699.0)	11455.5 (5818.3, 19474.6)	25102.6 (13643.8, 37260.9)	10498.3 (8084.9, 17060.1)	12903.4 (9805.2, 18195.5)	14301.7 (8398.9, 20984.8)	23582.4 (10137.0, 35227.8)	4716.9 (4716.9, 4716.9)	8363.5 (2503.1, 17762.9)	3954.1 (2144.5, 9428.5)
""" during index treatment, n	2927	216	313	270	85	140	80	304	26	3	1490	59	7.53228e-50	1085	90	73	106	36	91	41	40	14	1	593	77	5.90423e-19
Mean (SD)	7938.5 (7480.8)	8660.1 (5914.2)	9244.2 (5722.6)	7725.2 (5966.2)	24123.9 (9044.1)	8462.8 (5953.0)	7343.5 (6712.1)	10777.3 (5162.9)	10280.2 (7344.6)	8935.1 (8755.9)	6035.7 (7353.4)	2851.6 (1229.0)		6601.8 (8165.0)	7622.6 (5648.5)	7820.6 (5893.0)	6645.1 (5492.9)	21235.1 (22170.7)	7015.4 (3891.9)	6576.5 (5282.4)	9973.0 (6472.7)	11962.2 (12865.2)	1435.3 (-)	4993.7 (7112.2)	2533.3 (1246.4)
Median (Q1, Q3)	6155.0 (1858.1, 11874.2)	7981.4 (4740.7, 11510.4)	8676.3 (4916.4, 12808.0)	6678.1 (2270.0, 12485.8)	24020.2 (16909.1, 30954.5)	7501.5 (3963.2, 12553.6)	5308.9 (2227.8, 10608.4)	10690.4 (6675.7, 13852.9)	8938.5 (4983.0, 14675.4)	7707.6 (857.7, 18239.9)	3431.6 (737.1, 8375.6)	2424.4 (1870.7, 3581.3)		4580.2 (1229.2, 9487.4)	6536.8 (2789.6, 11900.9)	6664.8 (3278.1, 10187.5)	5663.4 (1724.6, 10109.8)	16882.0 (10203.7, 27612.7)	7416.5 (3992.3, 9655.3)	6580.8 (1761.8, 8578.8)	7741.4 (5310.1, 15509.9)	5808.5 (3821.5, 14572.8)	1435.3 (1435.3, 1435.3)	2539.3 (518.2, 6891.3)	2200.3 (1789.1, 2897.4)
""" during 3L (only for 2L cohort), n	2068	174	266	202	55	90	70	182	21	2	1006	30	0.000162048
Mean (SD)	5427.3 (10082.7)	4987.0 (5696.7)	4224.1 (4940.1)	4961.2 (6198.2)	8401.7 (13672.0)	5269.6 (4873.7)	4721.0 (6066.7)	3840.6 (4998.7)	5637.7 (5196.9)	5173.5 (6861.5)	6099.1 (12951.2)	5917.9 (7459.4)
Median (Q1, Q3)	2899.7 (544.2, 7427.3)	3164.2 (779.3, 7201.7)	2497.6 (1015.5, 6194.9)	2962.9 (410.3, 7556.5)	2121.0 (214.7, 8532.5)	4130.2 (1511.4, 7878.5)	2218.2 (939.8, 6439.2)	1914.3 (262.0, 6246.8)	4954.1 (2170.8, 7319.1)	5173.5 (321.7, 10025.3)	3153.4 (460.0, 8080.1)	3278.2 (91.3, 10109.8)
""" during 4L, n	1265	123	183	125	38	58	46	101	16	1	574	13	0.0434668	799	72	60	87	26	50	34	27	11	1	431	41	0.0976555
Mean (SD)	5000.1 (8800.5)	3868.8 (4949.8)	4489.6 (5604.1)	4520.6 (6300.5)	9548.4 (8782.6)	5462.8 (9109.5)	5522.4 (7401.7)	5194.9 (13258.6)	3555.7 (4353.3)	64.1 (-)	5134.4 (9818.4)	2872.1 (4720.1)		5486.0 (9516.9)	5104.4 (4372.2)	3880.0 (4495.3)	5415.9 (7100.5)	10596.0 (22773.6)	3536.4 (4112.6)	5512.5 (5778.6)	4613.8 (5430.6)	5688.9 (4213.0)	2243.9 (-)	5760.3 (10614.9)	6986.8 (7619.4)
Median (Q1, Q3)	2109.4 (315.4, 6436.1)	1996.5 (337.2, 5524.5)	2493.5 (461.9, 6061.0)	1915.6 (159.4, 6986.6)	5939.7 (2113.2, 16589.8)	1896.0 (360.7, 6518.8)	2560.9 (796.3, 6589.0)	1373.3 (98.4, 5530.3)	1964.0 (277.2, 4315.1)	64.1 (64.1, 64.1)	2187.2 (275.3, 6436.1)	517.7 (50.9, 1873.5)		2413.0 (413.5, 7534.5)	4740.8 (1056.1, 8099.1)	2101.0 (424.7, 6652.9)	2367.6 (525.8, 7672.9)	3748.1 (330.0, 10857.9)	2403.3 (603.1, 4541.2)	4021.0 (872.6, 7211.1)	1825.4 (85.7, 8085.7)	4445.0 (967.0, 9010.4)	2243.9 (2243.9, 2243.9)	2057.2 (313.1, 7534.5)	5812.0 (911.3, 9869.8)
""" during 5L, n	723	64	111	72	20	32	30	50	9	1	334	4	9.13661e-06	531	47	46	57	16	39	23	14	8	1	280	20	0.173572
Mean (SD)	4638.5 (11515.0)	2966.0 (3956.8)	4246.5 (5698.0)	2718.3 (4297.6)	16114.0 (43133.1)	4020.1 (5294.9)	5022.3 (7955.1)	3272.9 (8446.9)	5311.5 (12202.4)	16.0 (-)	5041.1 (11473.9)	2553.3 (1584.2)		4200.3 (7120.5)	3914.4 (6179.9)	3714.8 (6417.3)	4587.4 (8827.6)	2897.5 (4169.6)	5851.7 (7860.5)	3294.1 (4567.1)	9156.3 (16457.6)	7901.5 (9232.0)	614.7 (-)	3827.4 (6288.1)	5695.4 (6797.1)
Median (Q1, Q3)	1566.2 (223.1, 5271.5)	950.4 (124.0, 4226.6)	1413.4 (182.4, 7550.0)	1037.3 (226.5, 3349.0)	3987.5 (293.8, 7583.9)	2651.7 (944.4, 5116.8)	2786.1 (352.0, 6034.3)	981.6 (176.5, 4066.6)	228.9 (85.6, 2880.2)	16.0 (16.0, 16.0)	1861.8 (195.0, 5581.7)	2359.3 (1217.5, 3889.1)		1627.0 (226.4, 5271.5)	1942.2 (432.2, 5802.4)	1536.5 (186.0, 4844.3)	1936.7 (327.7, 4687.4)	794.8 (62.1, 4321.6)	3876.6 (526.3, 7709.8)	1746.7 (96.0, 4558.6)	4281.4 (1682.7, 8847.1)	4520.9 (84.8, 15420.1)	614.7 (614.7, 614.7)	1374.2 (218.3, 5190.6)	3344.3 (548.8, 7750.5)
""" during 6L+, n	381	33	59	38	15	17	16	27	5	0	171	2	0.074804	307	23	28	32	8	22	13	8	5	1	167	7	0.533753
Mean (SD)	9157.9 (21330.1)	6328.1 (9989.1)	7207.9 (12107.8)	6236.9 (9772.2)	19235.5 (34802.0)	5781.1 (7033.6)	4486.8 (6331.3)	9714.0 (15821.7)	8334.7 (9774.3)	-	10850.9 (27551.0)	8356.4 (3079.2)		8588.9 (16669.0)	8054.9 (11962.5)	4822.8 (5174.2)	8428.0 (15540.0)	15169.9 (28509.5)	6030.5 (7003.5)	8960.2 (14840.6)	6775.6 (8332.5)	10215.6 (9475.0)	423.0 (-)	9404.6 (19379.6)	16765.0 (14772.3)
Median (Q1, Q3)	2463.2 (386.3, 9535.7)	1635.2 (423.0, 6604.0)	2046.4 (386.3, 7814.0)	1258.2 (100.2, 9609.0)	4506.2 (325.1, 20636.9)	2237.9 (499.0, 8549.7)	694.6 (76.0, 6691.8)	4427.7 (1161.7, 13746.5)	4996.7 (110.6, 13952.8)	-	2565.4 (574.3, 10291.6)	8356.4 (6179.1, 10533.8)		2746.4 (483.0, 10143.4)	2237.1 (840.9, 12715.9)	3341.4 (425.9, 7631.9)	1233.4 (150.6, 7406.1)	4223.4 (1287.8, 13110.2)	4247.4 (645.2, 9917.3)	2325.4 (227.2, 13746.5)	4529.1 (1263.1, 8461.5)	13952.8 (621.1, 15010.1)	423.0 (423.0, 423.0)	2583.7 (499.0, 11575.9)	7814.0 (5347.8, 27794.2)
Other pharmacy costs, USD
""" during follow-up, n	2925	216	313	270	85	140	80	304	26	3	1488	59	2.7013e-28	1085	90	73	106	36	91	41	40	14	1	593	77	2.44375e-06
Mean (SD)	18864.4 (24314.4)	20889.0 (22128.3)	30933.9 (26842.7)	15794.3 (16583.3)	16355.5 (22175.8)	21123.7 (25196.3)	27499.6 (29999.7)	14757.2 (16207.3)	27583.9 (28394.9)	25945.8 (23128.9)	16727.7 (25313.4)	25216.9 (28913.6)		20985.0 (26515.7)	21855.3 (21706.8)	31501.1 (31034.2)	17997.5 (19579.7)	13147.4 (14173.4)	18306.1 (23346.0)	20656.7 (17317.0)	18743.9 (16378.9)	54299.4 (49541.6)	4348.3 (-)	20394.7 (28235.9)	22992.2 (21617.8)
Median (Q1, Q3)	11266.3 (4893.3, 22228.1)	13613.0 (6557.5, 24384.7)	20894.6 (13134.8, 41288.7)	10146.8 (5040.4, 20571.3)	8522.7 (3614.2, 18109.7)	12540.8 (5849.4, 22695.6)	17493.7 (9218.4, 34539.1)	10627.3 (5571.3, 16401.7)	18809.5 (10965.8, 37964.8)	14718.7 (10573.4, 52545.3)	8866.8 (3349.1, 20037.7)	15213.5 (10569.8, 26803.0)		11809.2 (5589.0, 24482.9)	12625.4 (6991.2, 28092.6)	18259.5 (11089.0, 38527.1)	13560.8 (5758.3, 22306.5)	9237.5 (2303.9, 18345.9)	10858.8 (4751.6, 24089.4)	14956.3 (8178.4, 30254.7)	13245.7 (9753.4, 23745.2)	38265.9 (18618.0, 87535.6)	4348.3 (4348.3, 4348.3)	10914.9 (4537.4, 22449.3)	14802.8 (9380.7, 31635.6)
""" during index treatment, n	2923	216	313	270	85	140	80	304	26	3	1486	59	4.59156e-22	1084	90	73	106	36	91	41	40	14	1	592	77	6.54307e-06
Mean (SD)	7151.4 (11540.5)	7648.7 (9488.2)	11237.9 (12795.8)	6101.1 (5844.5)	4991.7 (4750.6)	7877.5 (7979.4)	6790.8 (6804.6)	8076.9 (8605.5)	8624.9 (7775.0)	22756.6 (26422.8)	6237.2 (13268.4)	13835.4 (8152.1)		7372.6 (11272.3)	7289.7 (10896.0)	10158.4 (11872.3)	5554.6 (6078.3)	4587.5 (4501.5)	6223.7 (5346.1)	5823.8 (6380.3)	8474.9 (6604.6)	18372.5 (18883.7)	2059.9 (-)	7494.8 (12914.9)	12718.1 (10346.9)
Median (Q1, Q3)	4361.1 (1797.9, 8828.5)	5231.2 (2861.9, 9302.8)	7823.7 (4998.2, 14129.1)	4324.2 (2009.2, 8147.7)	3546.7 (1716.6, 6511.2)	5637.5 (2578.8, 9321.2)	4511.5 (2591.7, 9479.3)	5755.1 (3639.0, 9873.0)	6389.3 (3567.8, 12543.5)	13575.3 (2149.2, 52545.3)	2869.5 (1105.3, 7295.6)	11430.2 (9074.1, 15230.5)		4201.0 (1812.5, 8699.0)	4244.4 (2557.8, 7538.0)	6812.0 (4101.7, 12049.6)	3724.7 (1658.1, 7355.7)	3274.3 (1141.0, 7141.4)	4549.5 (2453.0, 8520.1)	3561.7 (2434.4, 7222.9)	7607.9 (4082.6, 9845.6)	10052.7 (5564.3, 28968.0)	2059.9 (2059.9, 2059.9)	3566.3 (1336.0, 8580.6)	9449.6 (7955.6, 13047.3)
""" during 3L (only for 2L cohort), n	2067	174	266	202	55	90	70	182	21	2	1005	30	5.76283e-07
Mean (SD)	6730.0 (10375.2)	6669.8 (9973.3)	8834.7 (11440.4)	5962.2 (8408.1)	5280.5 (8944.3)	8559.4 (13590.9)	9050.2 (11916.1)	5033.5 (8653.0)	9104.9 (11009.7)	2321.3 (1665.8)	6357.9 (10315.9)	14770.3 (29232.2)
Median (Q1, Q3)	3578.6 (1305.8, 8340.1)	3760.7 (1827.5, 7623.6)	6232.5 (2551.6, 10527.7)	2988.8 (1132.4, 7389.5)	1937.8 (425.6, 5925.5)	4152.0 (2108.6, 9214.1)	5002.7 (2764.1, 10211.2)	2096.9 (906.8, 6420.9)	6723.3 (1559.2, 10424.0)	2321.3 (1143.4, 3499.2)	3329.3 (1128.1, 7967.1)	4806.5 (2192.6, 12512.9)
""" during 4L, n	1264	123	183	125	38	58	46	101	16	1	573	13	1.72498e-05	798	72	60	87	26	50	34	27	11	1	430	41	0.11675
Mean (SD)	7301.2 (11912.5)	7682.3 (10676.4)	9801.1 (12965.0)	5615.2 (10449.4)	9633.4 (13735.8)	9244.0 (16910.3)	8341.8 (10738.8)	4523.1 (5779.2)	8572.8 (8528.4)	4085.4 (-)	6813.7 (12215.0)	13100.4 (17158.1)		7503.7 (12737.5)	8047.7 (11606.9)	9637.8 (13362.2)	7045.7 (11653.3)	6349.8 (8966.4)	6696.6 (7627.6)	8213.0 (9596.2)	7354.4 (9569.6)	15796.9 (17088.7)	278.4 (-)	7129.1 (13914.7)	10343.0 (12989.5)
Median (Q1, Q3)	3792.4 (1216.7, 8495.9)	3683.3 (1561.0, 9908.0)	6144.7 (2095.1, 11446.5)	2932.4 (741.1, 7170.5)	4696.9 (1454.8, 9779.0)	4990.0 (1559.5, 8256.0)	3990.4 (2139.0, 9576.6)	2233.2 (752.1, 6115.3)	5571.5 (1533.3, 13864.5)	4085.4 (4085.4, 4085.4)	3551.3 (988.0, 7870.9)	4134.6 (1372.7, 20119.3)		4057.9 (1457.1, 8505.3)	5715.0 (2576.3, 9812.1)	5853.6 (3033.3, 9920.9)	4134.6 (994.7, 9681.6)	4432.8 (1647.9, 7701.8)	4028.8 (1695.3, 7844.4)	5591.3 (1986.3, 12282.3)	2729.7 (1479.7, 8931.5)	9842.6 (1881.7, 29856.0)	278.4 (278.4, 278.4)	3307.6 (1094.7, 7759.5)	6701.8 (2379.4, 11354.5)
""" during 5L, n	722	64	110	72	20	32	30	50	9	1	334	4	1.54939e-07	531	47	46	57	16	39	23	14	8	1	280	20	0.0100602
Mean (SD)	7250.7 (10226.1)	5249.8 (8394.9)	10538.1 (11275.8)	4563.7 (4868.5)	6399.6 (6818.4)	8885.6 (12223.4)	9905.9 (12842.9)	3497.5 (3943.0)	3318.5 (2992.2)	839.6 (-)	7473.5 (11110.4)	9330.8 (5914.9)		7200.7 (10295.7)	8209.2 (10612.9)	8449.6 (10544.4)	5016.2 (5266.7)	3605.1 (4035.9)	8712.7 (12739.7)	9735.9 (14213.1)	4275.2 (3513.0)	15984.4 (17439.5)	1369.4 (-)	6973.8 (10313.5)	8015.4 (10274.4)
Median (Q1, Q3)	3482.3 (1286.4, 8663.8)	1951.9 (880.2, 5866.4)	5394.5 (2424.7, 15960.0)	2732.2 (999.2, 6434.2)	3640.3 (1611.8, 7946.2)	5589.1 (1663.9, 12331.6)	4770.2 (3100.5, 8184.6)	2402.0 (751.0, 5053.5)	2282.1 (729.7, 4858.4)	839.6 (839.6, 839.6)	3518.9 (1153.2, 9357.2)	10186.8 (5229.7, 13431.9)		3506.5 (1293.2, 8531.1)	4450.4 (1328.0, 9957.3)	3339.8 (1719.4, 11136.2)	3306.3 (1052.9, 6350.0)	1847.6 (1013.7, 5752.6)	4395.3 (2145.3, 12481.8)	3439.8 (1300.8, 15390.3)	2584.5 (2103.2, 6301.0)	8294.7 (3315.3, 29170.6)	1369.4 (1369.4, 1369.4)	3518.4 (1199.2, 7955.4)	5133.4 (1828.2, 6873.0)
""" during 6L+, n	380	33	59	38	14	17	16	27	5	0	171	2	0.403574	306	22	28	32	8	22	13	8	5	1	167	7	0.128969
Mean (SD)	15526.9 (21730.1)	12680.6 (18498.5)	14610.9 (16248.5)	10060.9 (15214.1)	12960.3 (13980.2)	15508.1 (11927.1)	21393.3 (36164.5)	17889.6 (24739.2)	26939.8 (42439.6)	-	16563.3 (23452.5)	10385.4 (5989.9)		16226.5 (23235.0)	15710.9 (14062.1)	21109.4 (28376.9)	13126.2 (19999.5)	10672.6 (9554.2)	19312.5 (19227.8)	8075.5 (10182.4)	19042.2 (19229.9)	40267.3 (59837.8)	640.7 (-)	15802.4 (23831.7)	29533.0 (20856.1)
Median (Q1, Q3)	8414.4 (2241.6, 20665.8)	4497.7 (918.1, 13728.0)	9264.0 (1755.7, 22079.6)	5113.6 (1885.0, 12369.4)	8868.4 (3843.2, 27919.6)	14022.2 (3967.9, 23905.5)	4525.0 (2330.1, 30099.5)	9160.1 (2911.6, 22869.0)	10795.4 (7021.0, 14523.2)	-	9255.5 (2864.0, 20883.1)	10385.4 (6149.9, 14620.9)		8237.4 (2329.7, 21112.1)	15226.1 (2807.6, 24685.2)	10000.1 (4373.0, 23497.9)	6279.3 (2217.4, 18080.6)	9760.6 (2224.9, 16418.3)	14933.2 (4682.4, 24921.8)	2497.7 (1536.0, 10671.7)	12587.3 (3324.8, 33110.9)	7021.0 (2351.5, 51382.0)	640.7 (640.7, 640.7)	7189.3 (2151.5, 20368.5)	29533.7 (12786.4, 42168.3)
Cost of radiation therapy, USD
""" during follow-up, n	830	79	94	81	14	38	30	85	7	1	401	9	0.153776	293	41	27	30	9	23	15	12	4	0	132	22	0.820371
Mean (SD)	3515.3 (2378.7)	3866.7 (2517.4)	3672.9 (2218.6)	3674.0 (2065.3)	3769.3 (2309.7)	3300.2 (1512.0)	3400.2 (1907.5)	3732.6 (2578.3)	2230.0 (1821.1)	715.2 (-)	3380.7 (2506.0)	3205.3 (894.8)		3675.1 (2584.4)	3565.2 (2318.4)	3990.1 (3420.8)	3680.9 (2159.8)	3078.2 (1751.6)	3021.8 (2349.9)	4182.3 (2189.0)	3421.3 (3254.5)	4639.7 (2086.6)	-	3734.1 (2661.7)	3214.1 (2619.6)
Median (Q1, Q3)	3112.9 (1844.4, 4472.9)	3385.9 (2116.7, 5000.1)	3375.0 (2020.3, 4796.8)	3410.2 (2009.7, 4732.0)	3886.6 (1747.4, 6154.8)	3344.3 (2205.9, 4089.8)	3009.2 (2344.7, 4250.1)	2871.8 (1603.0, 5092.9)	1772.9 (1048.6, 2696.5)	715.2 (715.2, 715.2)	2930.4 (1699.6, 4124.0)	3249.8 (2869.6, 3410.2)		3139.4 (1772.9, 4747.8)	3120.1 (1954.6, 4432.4)	3652.9 (1397.4, 5149.4)	3434.6 (2622.9, 4410.3)	3298.9 (1735.9, 4380.8)	2715.9 (1213.3, 3707.2)	3685.3 (3015.7, 6007.0)	2188.5 (1372.5, 4595.8)	5009.5 (3340.2, 5939.1)	-	3105.6 (1902.6, 4903.4)	2226.5 (1602.0, 3917.6)
""" during index treatment, n	407	44	24	39	8	18	7	49	2	0	216	5	0.299877	136	19	12	19	3	10	6	6	2	0	59	15	0.609631
Mean (SD)	3020.3 (1722.0)	3306.6 (1731.9)	3504.4 (1639.2)	2947.5 (1518.2)	2189.8 (1399.2)	3140.2 (1072.3)	2482.3 (1066.3)	3042.0 (1824.9)	1502.0 (1167.0)	-	2968.7 (1806.6)	3098.6 (376.4)		3118.3 (2109.3)	2902.6 (1819.1)	4156.3 (2567.5)	3358.6 (1555.2)	2218.3 (947.3)	2432.3 (1196.1)	3540.4 (1839.0)	2566.9 (1449.2)	3340.2 (2220.0)	-	3066.9 (2466.4)	2669.9 (1487.8)
Median (Q1, Q3)	2784.9 (1772.9, 3883.3)	3026.2 (2022.5, 4160.0)	3276.4 (2478.6, 4360.0)	2756.1 (1743.4, 3651.2)	2151.7 (996.9, 3075.9)	3194.3 (2272.1, 3701.9)	2623.8 (1480.5, 3464.3)	2776.0 (1462.0, 4537.3)	1502.0 (676.7, 2327.2)	-	2730.2 (1708.0, 3850.4)	2945.8 (2869.6, 3410.2)		2832.0 (1581.2, 4145.9)	2901.4 (896.7, 4120.7)	3726.3 (2995.8, 4634.4)	3410.2 (1907.0, 4880.1)	1825.1 (1531.0, 3298.9)	2295.1 (1531.5, 3596.7)	3752.0 (2009.7, 4663.9)	2188.5 (1446.5, 3038.4)	3340.2 (1770.5, 4910.0)	-	2288.7 (1508.5, 4008.2)	2020.3 (1602.0, 3348.4)
""" during 3L (only for 2L cohort), n	281	26	45	30	2	11	9	31	1	0	126	2	0.523084
Mean (SD)	2872.9 (1939.2)	2365.3 (1429.4)	2828.3 (1530.1)	3308.0 (1541.3)	3790.9 (3915.9)	3399.4 (1758.9)	2602.7 (1374.5)	2828.7 (1850.8)	1048.6 (-)	-	2874.1 (2270.7)	2464.8 (1110.2)
Median (Q1, Q3)	2516.4 (1487.3, 3878.6)	1836.3 (1074.3, 3341.0)	2516.4 (1770.5, 3846.9)	3124.1 (2009.7, 4139.4)	3790.9 (1021.9, 6559.8)	3521.9 (2082.5, 5124.2)	2533.1 (1907.0, 3056.4)	2318.2 (1406.2, 4171.1)	1048.6 (1048.6, 1048.6)	-	2263.2 (1487.3, 3606.9)	2464.8 (1679.8, 3249.8)
""" during 4L, n	146	18	22	13	2	7	8	10	3	0	63	1	0.814628	90	14	8	7	4	4	6	3	0	0	44	7	0.867509
Mean (SD)	2772.2 (2051.4)	2903.3 (2471.0)	2504.0 (1770.4)	2589.1 (1682.8)	2482.7 (3047.8)	2396.0 (1871.0)	3848.5 (1609.7)	2991.1 (1940.0)	1664.0 (897.2)	-	2798.6 (2220.7)	3368.8 (-)		3117.6 (2216.6)	3258.0 (1857.9)	2906.1 (3724.4)	3712.0 (3469.3)	2480.6 (2380.7)	3248.3 (2028.9)	4175.2 (1153.7)	3663.9 (2583.4)	-	-	2881.4 (1922.1)	2542.8 (939.7)
Median (Q1, Q3)	2142.8 (1293.7, 3917.6)	2182.0 (1638.0, 3385.9)	2036.2 (932.9, 3658.4)	2121.8 (1319.3, 4056.4)	2482.7 (327.6, 4637.8)	2066.6 (1113.4, 2930.4)	4245.9 (2224.5, 4934.6)	2659.8 (1577.0, 4202.9)	1221.3 (1074.3, 2696.5)	-	2110.8 (1293.7, 3635.4)	3368.8 (3368.8, 3368.8)		2658.9 (1534.7, 4202.9)	2746.1 (2076.9, 4432.4)	1692.9 (998.0, 2665.8)	2696.5 (1770.2, 4141.5)	2449.6 (423.0, 4538.2)	3204.9 (1528.9, 4967.7)	3871.0 (3316.0, 4672.6)	3272.6 (1298.5, 6420.6)	-	-	2567.0 (1510.7, 4066.0)	2344.7 (1868.2, 3252.7)
""" during 5L, n	89	10	16	10	3	3	6	6	1	1	33	1	0.286025	63	11	5	3	3	9	4	2	1	0	25	2	0.408941
Mean (SD)	2515.9 (1769.5)	1858.0 (1123.4)	2961.1 (1799.5)	2917.7 (2055.5)	3013.7 (3224.2)	1448.8 (1302.4)	2464.9 (1270.5)	4132.8 (2830.1)	1772.9 (-)	715.2 (-)	2221.7 (1475.4)	5056.3 (-)		2662.3 (1813.4)	2504.2 (1330.4)	3310.0 (2292.4)	1353.5 (1148.4)	1664.8 (686.5)	3017.3 (1799.6)	1957.8 (1592.8)	3282.0 (3473.2)	6769.4 (-)	-	2650.1 (1879.1)	474.1 (567.8)
Median (Q1, Q3)	2266.5 (1057.8, 3605.7)	1519.0 (1066.6, 2483.1)	2953.9 (1370.7, 4273.4)	2894.5 (1051.0, 3824.3)	1321.6 (987.9, 6731.6)	1057.8 (386.7, 2901.9)	2724.0 (1713.9, 3596.4)	4446.0 (1650.4, 6055.0)	1772.9 (1772.9, 1772.9)	715.2 (715.2, 715.2)	2266.5 (987.9, 2989.3)	5056.3 (5056.3, 5056.3)		2456.8 (1072.9, 3611.0)	2045.7 (1523.8, 3793.6)	3987.0 (1499.0, 4559.9)	1051.0 (386.7, 2622.9)	1321.6 (1217.6, 2455.3)	2901.9 (2308.2, 3596.4)	2017.4 (633.1, 3282.5)	3282.0 (826.1, 5738.0)	6769.4 (6769.4, 6769.4)	-	2456.8 (1262.6, 3605.7)	474.1 (72.6, 875.6)
""" during 6L+, n	78	7	12	6	4	5	4	7	1	0	32	0	0.816501	63	6	9	6	3	4	3	3	1	0	28	3	0.027508
Mean (SD)	3237.5 (2321.9)	3948.9 (2477.0)	2617.1 (1836.5)	3426.9 (2681.3)	3415.9 (1868.4)	2074.9 (1068.2)	3906.7 (2242.9)	3688.3 (2586.5)	4792.6 (-)	-	3207.5 (2627.9)	-		3244.4 (2408.9)	2978.0 (2801.2)	2006.5 (1685.8)	2761.5 (712.6)	2044.1 (1943.2)	1257.6 (348.4)	2870.1 (2001.3)	2699.4 (3146.7)	5108.9 (-)	-	4247.3 (2658.7)	3970.9 (3024.2)
Median (Q1, Q3)	2712.2 (1248.5, 4582.8)	5166.8 (1397.4, 5561.8)	2177.3 (1137.8, 3829.2)	2955.7 (859.0, 5435.4)	4228.0 (2411.0, 4420.8)	1951.7 (1586.2, 2494.4)	3900.2 (2069.0, 5744.4)	3663.5 (1227.2, 6276.3)	4792.6 (4792.6, 4792.6)	-	2430.4 (1153.2, 4119.8)	-		2691.4 (1248.5, 4792.6)	1512.7 (1057.8, 5829.4)	1397.4 (1217.7, 1951.7)	2852.0 (2691.4, 3192.8)	1248.5 (624.9, 4258.8)	1225.7 (977.3, 1537.9)	1942.8 (1500.6, 5166.8)	1021.9 (746.9, 6329.3)	5108.9 (5108.9, 5108.9)	-	4016.2 (2198.9, 5579.7)	4571.8 (691.3, 6649.6)
Cost of stem cell transplants, USD
""" during follow-up, n	413	17	140	12	2	16	19	2	5	0	200	59	0.764381	215	15	29	6	1	12	7	3	5	0	137	77	0.0189097
Mean (SD)	3247.4 (1137.9)	3123.1 (1493.0)	3208.3 (912.0)	3546.6 (1774.0)	2724.4 (163.8)	3223.3 (1101.3)	3380.5 (1046.1)	3474.1 (1142.3)	2756.5 (135.1)	-	3272.0 (1236.8)	3042.2 (841.4)		3284.4 (1294.0)	2795.0 (237.4)	3615.1 (1874.3)	3369.4 (1362.9)	2855.1 (-)	2993.1 (520.9)	2941.2 (316.1)	3028.7 (485.0)	4730.1 (1758.2)	-	3263.3 (1254.2)	2936.5 (754.4)
Median (Q1, Q3)	2855.1 (2666.3, 3091.3)	2758.1 (2758.1, 2840.1)	2855.1 (2758.1, 3512.6)	2855.1 (2799.1, 2973.2)	2724.4 (2608.6, 2840.1)	2799.1 (2608.6, 3302.0)	2855.1 (2758.1, 3868.8)	3474.1 (2666.3, 4281.8)	2855.1 (2608.6, 2855.1)	-	2855.1 (2666.3, 3512.5)	2855.1 (2666.3, 3091.3)		2855.1 (2666.3, 3091.3)	2758.1 (2666.3, 2855.1)	2855.1 (2758.1, 3579.7)	2847.6 (2758.1, 2855.1)	2855.1 (2855.1, 2855.1)	2855.1 (2758.1, 2855.1)	2855.1 (2758.1, 3091.3)	2840.1 (2666.3, 3579.7)	5940.9 (2855.1, 5946.4)	-	2758.1 (2666.3, 3091.3)	2758.1 (2666.3, 2855.1)
""" during index treatment, n	74	0	4	0	0	1	0	0	0	0	69	59	0.879197	99	0	2	0	0	0	0	0	1	0	96	77	0.656127
Mean (SD)	3436.6 (1061.0)	-	3217.1 (646.5)	-	-	3579.7 (-)	-	-	-	-	3447.3 (1089.4)	2937.9 (369.8)		3126.9 (899.4)	-	2683.3 (105.8)	-	-	-	-	-	3091.3 (-)	-	3136.5 (911.1)	2856.6 (306.4)
Median (Q1, Q3)	2855.1 (2666.3, 3579.7)	-	2973.2 (2806.6, 3627.6)	-	-	3579.7 (3579.7, 3579.7)	-	-	-	-	2855.1 (2666.3, 3579.7)	2855.1 (2666.3, 3091.3)		2855.1 (2666.3, 3091.3)	-	2683.3 (2608.6, 2758.1)	-	-	-	-	-	3091.3 (3091.3, 3091.3)	-	2855.1 (2666.3, 3091.3)	2758.1 (2666.3, 2855.1)
""" during 3L (only for 2L cohort), n	203	12	92	6	1	7	11	0	3	0	71	1	0.0224842
Mean (SD)	2976.8 (638.3)	2760.2 (80.6)	2983.0 (420.2)	3756.7 (2356.9)	2608.6 (-)	2808.9 (380.8)	2962.2 (465.0)	-	2772.9 (142.4)	-	2972.0 (661.4)	6149.8 (-)
Median (Q1, Q3)	2840.1 (2666.3, 3091.3)	2758.1 (2712.2, 2840.1)	2840.1 (2758.1, 3091.3)	2847.6 (2758.1, 2855.1)	2608.6 (2608.6, 2608.6)	2608.6 (2608.6, 3091.3)	2855.1 (2666.3, 3091.3)	-	2855.1 (2608.6, 2855.1)	-	2758.1 (2666.3, 2855.1)	6149.8 (6149.8, 6149.8)
""" during 4L, n	87	3	29	4	1	6	5	2	2	0	35	0	0.774221	73	6	17	5	1	7	7	3	3	0	24	0	0.0373596
Mean (SD)	3122.2 (803.5)	2767.9 (138.2)	3241.4 (798.4)	2827.1 (46.6)	2840.1 (-)	3342.0 (1378.7)	3080.3 (675.9)	3474.1 (1142.3)	2731.8 (174.3)	-	3066.1 (818.6)	-		3086.3 (803.7)	2722.8 (111.2)	3408.2 (992.7)	3491.7 (1486.5)	2855.1 (-)	2996.0 (573.9)	2941.2 (316.1)	3028.7 (485.0)	3921.0 (1930.8)	-	2845.7 (427.8)	-
Median (Q1, Q3)	2855.1 (2758.1, 3091.3)	2840.1 (2608.6, 2855.1)	3091.3 (2758.1, 3579.7)	2847.6 (2799.1, 2855.1)	2840.1 (2840.1, 2840.1)	2840.1 (2758.1, 2855.1)	2840.1 (2758.1, 2855.1)	3474.1 (2666.3, 4281.8)	2731.8 (2608.6, 2855.1)	-	2840.1 (2608.6, 2855.1)	-		2840.1 (2666.3, 3091.3)	2712.2 (2608.6, 2840.1)	3091.3 (2758.1, 3579.7)	2855.1 (2840.1, 2855.1)	2855.1 (2855.1, 2855.1)	2855.1 (2758.1, 2855.1)	2855.1 (2758.1, 3091.3)	2840.1 (2666.3, 3579.7)	2855.1 (2758.1, 6149.8)	-	2758.1 (2608.6, 2855.1)	-
""" during 5L, n	37	3	12	1	0	1	2	0	0	0	18	0	0.458689	30	6	6	1	0	2	0	0	1	0	14	1	0.089763
Mean (SD)	3467.4 (1258.5)	3888.7 (1958.2)	3576.1 (1257.4)	3091.3 (-)	-	2855.1 (-)	4760.3 (1669.6)	-	-	-	3236.0 (1179.9)	-		3322.7 (1192.3)	2912.1 (334.7)	3068.0 (421.1)	2758.1 (-)	-	2806.6 (68.6)	-	-	5940.9 (-)	-	3534.8 (1520.1)	6149.8 (-)
Median (Q1, Q3)	2855.1 (2758.1, 3579.7)	2758.1 (2758.1, 6149.8)	2973.2 (2758.1, 3724.3)	3091.3 (3091.3, 3091.3)	-	2855.1 (2855.1, 2855.1)	4760.3 (3579.7, 5940.9)	-	-	-	2840.1 (2758.1, 3512.6)	-		2840.1 (2758.1, 3512.6)	2806.6 (2758.1, 2855.1)	2965.7 (2758.1, 3091.3)	2758.1 (2758.1, 2758.1)	-	2806.6 (2758.1, 2855.1)	-	-	5940.9 (5940.9, 5940.9)	-	2799.1 (2666.3, 3579.7)	6149.8 (6149.8, 6149.8)
""" during 6L+, n	24	0	8	1	0	2	2	0	0	0	11	0	0.320807	20	3	5	0	0	3	0	0	1	0	8	0	0.194534
Mean (SD)	3444.7 (1362.2)	-	3119.2 (1140.7)	5618.8 (-)	-	2712.2 (64.9)	3362.0 (716.8)	-	-	-	3632.0 (1612.6)	-		3580.6 (1458.6)	2705.0 (120.5)	4624.9 (1756.5)	-	-	3110.8 (667.9)	-	-	2855.1 (-)	-	3523.0 (1612.2)	-
Median (Q1, Q3)	2758.1 (2637.5, 3362.0)	-	2758.1 (2608.6, 2840.1)	5618.8 (5618.8, 5618.8)	-	2712.2 (2666.3, 2758.1)	3362.0 (2855.1, 3868.8)	-	-	-	2666.3 (2608.6, 6117.6)	-		2758.1 (2637.5, 4743.8)	2666.3 (2608.6, 2840.1)	5618.8 (2758.1, 5931.5)	-	-	2855.1 (2608.6, 3868.8)	-	-	2855.1 (2855.1, 2855.1)	-	2666.3 (2608.6, 4437.8)	-
Cost of allogeneic stem cell transplants, USD
""" during follow-up, n	23	1	3	1	0	1	1	0	0	0	16	1	0.979906	11	0	2	1	0	0	0	0	2	0	6	1	0.142031
Mean (SD)	6281.1 (1339.0)	6149.8 (-)	6139.1 (18.6)	5618.8 (-)	-	6149.8 (-)	5940.9 (-)	-	-	-	6386.8 (1604.5)	6149.8 (-)		6739.7 (1851.3)	-	8854.7 (4576.4)	6149.8 (-)	-	-	-	-	6045.4 (147.8)	-	6364.4 (664.2)	6149.8 (-)
Median (Q1, Q3)	6117.6 (5618.8, 6149.8)	6149.8 (6149.8, 6149.8)	6149.8 (6117.6, 6149.8)	5618.8 (5618.8, 5618.8)	-	6149.8 (6149.8, 6149.8)	5940.9 (5940.9, 5940.9)	-	-	-	6029.2 (5618.8, 6149.8)	6149.8 (6149.8, 6149.8)		6149.8 (5940.9, 6149.8)	-	8854.7 (5618.8, 12090.7)	6149.8 (6149.8, 6149.8)	-	-	-	-	6045.4 (5940.9, 6149.8)	-	6133.7 (6117.6, 6149.8)	6149.8 (6149.8, 6149.8)
""" during index treatment, n	10	0	0	0	0	0	0	0	0	0	10	0	-	2	0	0	0	0	0	0	0	0	0	2	0	-
Mean (SD)	5856.1 (257.3)	-	-	-	-	-	-	-	-	-	5856.1 (257.3)	-		6045.4 (147.8)	-	-	-	-	-	-	-	-	-	6045.4 (147.8)	-
Median (Q1, Q3)	5743.2 (5618.8, 6149.8)	-	-	-	-	-	-	-	-	-	5743.2 (5618.8, 6149.8)	-		6045.4 (5940.9, 6149.8)	-	-	-	-	-	-	-	-	-	6045.4 (5940.9, 6149.8)	-
""" during 3L (only for 2L cohort), n	1	0	0	0	0	0	0	0	0	0	1	1	-
Mean (SD)	5940.9 (-)	-	-	-	-	-	-	-	-	-	5940.9 (-)	6149.8 (-)
Median (Q1, Q3)	5940.9 (5940.9, 5940.9)	-	-	-	-	-	-	-	-	-	5940.9 (5940.9, 5940.9)	6149.8 (6149.8, 6149.8)
""" during 4L, n	4	0	1	0	0	1	0	0	0	0	2	0	-	3	0	1	1	0	0	0	0	1	0	0	0	-
Mean (SD)	5964.8 (250.9)	-	6149.8 (-)	-	-	6149.8 (-)	-	-	-	-	5779.8 (227.8)	-		6080.2 (120.6)	-	5940.9 (-)	6149.8 (-)	-	-	-	-	6149.8 (-)	-	-	-
Median (Q1, Q3)	6045.4 (5779.8, 6149.8)	-	6149.8 (6149.8, 6149.8)	-	-	6149.8 (6149.8, 6149.8)	-	-	-	-	5779.8 (5618.8, 5940.9)	-		6149.8 (5940.9, 6149.8)	-	5940.9 (5940.9, 5940.9)	6149.8 (6149.8, 6149.8)	-	-	-	-	6149.8 (6149.8, 6149.8)	-	-	-
""" during 5L, n	5	1	2	0	0	0	1	0	0	0	1	0	-	3	0	0	0	0	0	0	0	1	0	2	1	-
Mean (SD)	6413.7 (730.1)	6149.8 (-)	6133.7 (22.8)	-	-	-	5940.9 (-)	-	-	-	7710.6 (-)	-		6589.7 (974.8)	-	-	-	-	-	-	-	5940.9 (-)	-	6914.1 (1126.4)	6149.8 (-)
Median (Q1, Q3)	6149.8 (6117.6, 6149.8)	6149.8 (6149.8, 6149.8)	6133.7 (6117.6, 6149.8)	-	-	-	5940.9 (5940.9, 5940.9)	-	-	-	7710.6 (7710.6, 7710.6)	-		6117.6 (5940.9, 7710.6)	-	-	-	-	-	-	-	5940.9 (5940.9, 5940.9)	-	6914.1 (6117.6, 7710.6)	6149.8 (6149.8, 6149.8)
""" during 6L+, n	4	0	0	1	0	0	0	0	0	0	3	0	-	4	0	2	0	0	0	0	0	0	0	2	0	-
Mean (SD)	6009.0 (260.6)	-	-	5618.8 (-)	-	-	-	-	-	-	6139.1 (18.6)	-		6009.0 (260.6)	-	5884.3 (375.5)	-	-	-	-	-	-	-	6133.7 (22.8)	-
Median (Q1, Q3)	6133.7 (5868.2, 6149.8)	-	-	5618.8 (5618.8, 5618.8)	-	-	-	-	-	-	6149.8 (6117.6, 6149.8)	-		6133.7 (5868.2, 6149.8)	-	5884.3 (5618.8, 6149.8)	-	-	-	-	-	-	-	6133.7 (6117.6, 6149.8)	-
Cost of autologous stem cell transplants, USD
""" during follow-up, n	407	17	139	11	2	16	19	2	5	0	196	59	0.339286	213	15	28	6	1	12	7	3	4	0	137	77	0.118009
Mean (SD)	3194.5 (1065.1)	2761.3 (82.9)	3187.2 (880.1)	3358.2 (1730.1)	2724.4 (163.8)	3223.3 (1101.3)	3380.5 (1046.1)	3474.1 (1142.3)	2756.5 (135.1)	-	3220.7 (1195.0)	3042.2 (841.4)		3260.0 (1274.8)	2795.0 (237.4)	3543.5 (1867.9)	3369.4 (1362.9)	2855.1 (-)	2993.1 (520.9)	2941.2 (316.1)	3028.7 (485.0)	4375.1 (1811.6)	-	3263.3 (1254.2)	2856.6 (306.4)
Median (Q1, Q3)	2855.1 (2666.3, 3091.3)	2758.1 (2758.1, 2840.1)	2855.1 (2758.1, 3512.6)	2855.1 (2758.1, 2855.1)	2724.4 (2608.6, 2840.1)	2799.1 (2608.6, 3302.0)	2855.1 (2758.1, 3868.8)	3474.1 (2666.3, 4281.8)	2855.1 (2608.6, 2855.1)	-	2847.6 (2666.3, 3091.3)	2855.1 (2666.3, 3091.3)		2840.1 (2666.3, 3091.3)	2758.1 (2666.3, 2855.1)	2855.1 (2758.1, 3546.2)	2847.6 (2758.1, 2855.1)	2855.1 (2855.1, 2855.1)	2855.1 (2758.1, 2855.1)	2855.1 (2758.1, 3091.3)	2840.1 (2666.3, 3579.7)	4398.0 (2806.6, 5943.7)	-	2758.1 (2666.3, 3091.3)	2758.1 (2666.3, 2855.1)
""" during index treatment, n	71	0	4	0	0	1	0	0	0	0	66	59	0.922083	99	0	2	0	0	0	0	0	1	0	96	77	0.656127
Mean (SD)	3335.2 (956.2)	-	3217.1 (646.5)	-	-	3579.7 (-)	-	-	-	-	3338.7 (981.7)	2937.9 (369.8)		3126.9 (899.4)	-	2683.3 (105.8)	-	-	-	-	-	3091.3 (-)	-	3136.5 (911.1)	2856.6 (306.4)
Median (Q1, Q3)	2855.1 (2666.3, 3579.7)	-	2973.2 (2806.6, 3627.6)	-	-	3579.7 (3579.7, 3579.7)	-	-	-	-	2855.1 (2666.3, 3579.7)	2855.1 (2666.3, 3091.3)		2855.1 (2666.3, 3091.3)	-	2683.3 (2608.6, 2758.1)	-	-	-	-	-	3091.3 (3091.3, 3091.3)	-	2855.1 (2666.3, 3091.3)	2758.1 (2666.3, 2855.1)
""" during 3L (only for 2L cohort), n	203	12	92	6	1	7	11	0	3	0	71	1	0.0224842
Mean (SD)	2976.8 (638.3)	2760.2 (80.6)	2983.0 (420.2)	3756.7 (2356.9)	2608.6 (-)	2808.9 (380.8)	2962.2 (465.0)	-	2772.9 (142.4)	-	2972.0 (661.4)	6149.8 (-)
Median (Q1, Q3)	2840.1 (2666.3, 3091.3)	2758.1 (2712.2, 2840.1)	2840.1 (2758.1, 3091.3)	2847.6 (2758.1, 2855.1)	2608.6 (2608.6, 2608.6)	2608.6 (2608.6, 3091.3)	2855.1 (2666.3, 3091.3)	-	2855.1 (2608.6, 2855.1)	-	2758.1 (2666.3, 2855.1)	6149.8 (6149.8, 6149.8)
""" during 4L, n	85	3	28	4	1	6	5	2	2	0	34	0	0.699372	72	6	17	5	1	7	7	3	2	0	24	0	0.0733448
Mean (SD)	3057.2 (688.0)	2767.9 (138.2)	3137.5 (580.1)	2827.1 (46.6)	2840.1 (-)	3342.0 (1378.7)	3080.3 (675.9)	3474.1 (1142.3)	2731.8 (174.3)	-	2991.0 (698.0)	-		3043.7 (721.8)	2722.8 (111.2)	3408.2 (992.7)	3491.7 (1486.5)	2855.1 (-)	2996.0 (573.9)	2941.2 (316.1)	3028.7 (485.0)	2806.6 (68.6)	-	2845.7 (427.8)	-
Median (Q1, Q3)	2855.1 (2758.1, 3091.3)	2840.1 (2608.6, 2855.1)	3091.3 (2758.1, 3546.2)	2847.6 (2799.1, 2855.1)	2840.1 (2840.1, 2840.1)	2840.1 (2758.1, 2855.1)	2840.1 (2758.1, 2855.1)	3474.1 (2666.3, 4281.8)	2731.8 (2608.6, 2855.1)	-	2799.1 (2608.6, 2855.1)	-		2840.1 (2666.3, 3091.3)	2712.2 (2608.6, 2840.1)	3091.3 (2758.1, 3579.7)	2855.1 (2840.1, 2855.1)	2855.1 (2855.1, 2855.1)	2855.1 (2758.1, 2855.1)	2855.1 (2758.1, 3091.3)	2840.1 (2666.3, 3579.7)	2806.6 (2758.1, 2855.1)	-	2758.1 (2608.6, 2855.1)	-
""" during 5L, n	36	2	12	1	0	1	2	0	0	0	18	0	0.333504	30	6	6	1	0	2	0	0	1	0	14	0	0.089763
Mean (SD)	3392.9 (1190.7)	2758.1 (0.0)	3576.1 (1257.4)	3091.3 (-)	-	2855.1 (-)	4760.3 (1669.6)	-	-	-	3236.0 (1179.9)	-		3322.7 (1192.3)	2912.1 (334.7)	3068.0 (421.1)	2758.1 (-)	-	2806.6 (68.6)	-	-	5940.9 (-)	-	3534.8 (1520.1)	-
Median (Q1, Q3)	2855.1 (2758.1, 3546.2)	2758.1 (2758.1, 2758.1)	2973.2 (2758.1, 3724.3)	3091.3 (3091.3, 3091.3)	-	2855.1 (2855.1, 2855.1)	4760.3 (3579.7, 5940.9)	-	-	-	2840.1 (2758.1, 3512.6)	-		2840.1 (2758.1, 3512.6)	2806.6 (2758.1, 2855.1)	2965.7 (2758.1, 3091.3)	2758.1 (2758.1, 2758.1)	-	2806.6 (2758.1, 2855.1)	-	-	5940.9 (5940.9, 5940.9)	-	2799.1 (2666.3, 3579.7)	-
""" during 6L+, n	23	0	8	0	0	2	2	0	0	0	11	0	0.597799	19	3	4	0	0	3	0	0	1	0	8	0	0.36464
Mean (SD)	3350.2 (1309.8)	-	3119.2 (1140.7)	-	-	2712.2 (64.9)	3362.0 (716.8)	-	-	-	3632.0 (1612.6)	-		3473.3 (1415.2)	2705.0 (120.5)	4376.4 (1924.1)	-	-	3110.8 (667.9)	-	-	2855.1 (-)	-	3523.0 (1612.2)	-
Median (Q1, Q3)	2758.1 (2608.6, 2855.1)	-	2758.1 (2608.6, 2840.1)	-	-	2712.2 (2666.3, 2758.1)	3362.0 (2855.1, 3868.8)	-	-	-	2666.3 (2608.6, 6117.6)	-		2758.1 (2608.6, 3868.8)	2666.3 (2608.6, 2840.1)	4344.8 (2712.2, 6040.7)	-	-	2855.1 (2608.6, 3868.8)	-	-	2855.1 (2855.1, 2855.1)	-	2666.3 (2608.6, 4437.8)	-
Total cost of end-of-life care (1 month prior to death), USD
N	918	84	119	103	24	38	31	83	8	2	426	8	0.0524715	419	38	32	43	10	31	19	12	4	0	230	13	0.123262
Mean (SD)	12742.6 (9116.5)	13489.7 (10759.3)	14680.6 (10818.0)	11539.5 (6244.1)	13347.8 (7999.5)	14944.9 (9444.7)	13620.8 (6620.3)	11543.6 (6330.3)	11105.4 (5514.3)	6657.5 (793.0)	12343.3 (9466.8)	19193.9 (17926.7)		13195.7 (9282.5)	13247.4 (10947.6)	17165.0 (12111.2)	13259.8 (6753.7)	10484.4 (4873.5)	14934.3 (10580.1)	14209.4 (10723.8)	10568.6 (4096.3)	17097.9 (9115.1)	-	12492.0 (8889.3)	19408.5 (14632.7)
Median (Q1, Q3)	10211.7 (7179.8, 16225.7)	10916.5 (6632.6, 17019.8)	12791.0 (7139.6, 20334.8)	9679.0 (7146.5, 15759.4)	11664.2 (8127.8, 18235.9)	13475.1 (8914.0, 19228.7)	12421.5 (9379.9, 16712.4)	10299.2 (7726.8, 15079.6)	9543.0 (7028.6, 13850.2)	6657.5 (6096.7, 7218.2)	9512.3 (6964.0, 15616.6)	10088.4 (6859.6, 29680.6)		10848.8 (7368.0, 16449.7)	8899.4 (7139.6, 17558.4)	12974.3 (10064.2, 19810.1)	11342.9 (8651.3, 16674.0)	9610.9 (8005.2, 10636.6)	12574.2 (8590.3, 16725.3)	12219.5 (6482.9, 19999.0)	10507.0 (8561.4, 12956.3)	13901.2 (11492.6, 22703.2)	-	10323.0 (6964.0, 15618.0)	18035.8 (10578.9, 21936.8)
*Only calculated for all regimens excluding Autologous SCT Conditioning Therapy

## Sheet: Supp Table 8
Supplementary Table 8. Additional HCRU results for COVID-19 analysis.
	2L			3L
	Pre-COVID-19 Subgroup	Post-COVID-19 Subgroup	P value	Pre-COVID-19 Subgroup	Post-COVID-19 Subgroup	P value
	(n=322)	(n=318)		(n=48)	(n=40)
Number of emergency room visits
""" during index treatment, n (%)	3 (0.9)	2 (0.6)		1 (2.1)	1 (2.5)
Mean (SD)	1.0 (0.0)	1.0 (0.0)	-	1.0 (-)	1.0 (-)	-
Median (Q1, Q3)	1.0 (1.0, 1.0)	1.0 (1.0, 1.0)		1.0 (1.0, 1.0)	1.0 (1.0, 1.0)
""" on average per month during index treatment
Mean (SD)	1.1 (0.7)	0.3 (0.0)	0.197846	0.9 (-)	0.7 (-)	-
Median (Q1, Q3)	1.4 (0.3, 1.6)	0.3 (0.3, 0.3)		0.9 (0.9, 0.9)	0.7 (0.7, 0.7)
Number of ICU admissions
""" during index treatment, n (%)	3 (0.9)	0 (0.0)		1 (2.1)	0 (0.0)
Mean (SD)	1.0 (0.0)	-	-	1.0 (-)	-	-
Median (Q1, Q3)	1.0 (1.0, 1.0)	-		1.0 (1.0, 1.0)	-
""" on average per month during index treatment
Mean (SD)	0.6 (0.1)	-	-	0.9 (-)	-	-
Median (Q1, Q3)	0.6 (0.5, 0.7)	-		0.9 (0.9, 0.9)	-
Average length of ICU stay, days
""" during index treatment, n (%)	3 (0.9)	0 (0.0)		1 (2.1)	0 (0.0)
Mean (SD)	2.0 (1.0)	-	-	14.0 (-)	-	-
Median (Q1, Q3)	2.0 (1.0, 3.0)	-		14.0 (14.0, 14.0)	-
Number of stem cell transplants (allogeneic)
""" during index treatment, n (%)	0 (0.0)	0 (0.0)		0 (0.0)	0 (0.0)
Mean (SD)	-	-	-	-	-	-
Median (Q1, Q3)	-	-		-	-
""" on average per month during index treatment
Mean (SD)	-	-	-	-	-	-
Median (Q1, Q3)	-	-		-	-
Number of radiation therapy procedures
""" during index treatment, n (%)	16 (5.0)	5 (1.6)		2 (4.2)	2 (5.0)
Mean (SD)	11.7 (7.1)	13.4 (10.2)	0.674236	1.0 (0.0)	16.0 (5.7)	0.165905
Median (Q1, Q3)	10.0 (8.5, 15.5)	9.0 (9.0, 23.0)		1.0 (1.0, 1.0)	16.0 (12.0, 20.0)
""" on average per month during index treatment
Mean (SD)	8.0 (6.1)	11.8 (9.4)	0.295889	5.3 (6.6)	7.7 (0.9)	0.663983
Median (Q1, Q3)	6.9 (3.4, 12.8)	15.0 (3.1, 19.7)		5.3 (0.6, 10.0)	7.7 (7.1, 8.3)
Number of stem cell transplants (autologous)
""" during index treatment, n (%)	1 (0.3)	4 (1.3)		1 (2.1)	0 (0.0)
Mean (SD)	4.3 (-)	2.3 (1.2)	-	1.00 (-)	-	-
Median (Q1, Q3)	4.3 (4.3, 4.3)	2.4 (1.2, 3.3)		1.0 (1.0, 1.0)	-
""" on average per month during index treatment
Mean (SD)	4.3 (-)	2.3 (1.2)	-	4.3 (-)	-	-
Median (Q1, Q3)	4.3 (4.3, 4.3)	2.4 (1.2, 3.3)		4.3 (4.3, 4.3)	-
